# Supplementary material
Source: PubMed Central journal article supplement (PMC8214678)
Supplement: pnas.2019183118.sapp.pdf [file pnas.2019183118.sapp.pdf]

## ***SI Appendix***

### **Materials and Methods**

#### **Culture of the Fission Yeast**

*S. pombe* cells were cultured routinely in YES (yeast extract with supplements) or EMM (Edinburgh minimal media 2) with appropriate supplements (Moreno et al., 1991, Molecular genetic analysis of fission yeast *Schizosaccharomyces pombe*. *Methods in enzymology* 194:795-823). For dilution assays, cells in log-phase growth were harvested, counted, plated as a five-fold serial dilutions on YES media with or without the indicated HU concentration, and photographed after three to five days of incubation at 30°C. For the cell viability assay log-phase cells were cultured in the presence of 12.5 mM HU for 3 hours. Cells were harvested, washed to remove HU, and plated on YES plates. The number of colonies was counted after four or five days of incubation.

#### **The Preparation of Whole Cell Extracts and Chromatin Extracts**

Whole cell extracts were prepared from 5 ml of cell culture ( $OD_{600}=0.8\sim 1.0$ ). Cells were harvested, washed once with 1 ml of 20% TCA and resuspended in 500  $\mu$ l 20% TCA. 500  $\mu$ l of acid-washed glass beads (Sigma, G8772) were added and cells broken by vortexing (8 min). The supernatant was transferred to a fresh tube, centrifuged at 3000 rpm for 10 min and the precipitate resuspended in 1 $\times$  SDS loading buffer (100 mM Tris pH=11, 2% SDS, 100 mM DTT), boiled at 95°C for 5 min, separated by SDS-PAGE, and transferred to 0.45  $\mu$ m PVDF membrane (Millipore, immobilon-P<sup>SQ</sup>). Membranes were sequentially incubated with primary and

secondary antibodies and detected by SuperSignal West Pico chemiluminescence (Thermo, 34078).

Chromatin extracts were prepared from 1 liter of culture. Cells were harvested, washed with the stopping buffer (20 mM Tris-HCl pH 7.5, 150 mM NaCl, 50 mM NaF, 10 mM EDTA, 1 mM NaN<sub>3</sub>), resuspended in 2 ml of 1.2 M sorbitol containing 10 mM DTT and 1.5 mg/ml lysing Enzyme (Sigma, L1412) plus 1KU lyticase (Sigma, L4025) and incubated at 30 °C for 30~60 min (until ~90% cells became “ghost” cells upon addition of 1% Triton-X100). Spheroplasts were harvested by centrifugation (1000 g 5 min.), resuspended in buffer D<sub>100</sub> (25 mM Tris-HCl pH 7.5, 100 mM NaCl, 10% glycerol, 1 mM PMSF, proteinase inhibitor cocktail (Amresco)) and lysed with 1% Triton X-100. Following centrifugation (3000 g, 7 min.) the supernatants (whole cell extracts: WCEs) were loaded onto 10x volume of 30% sucrose dissolved in buffer (25 mM Tris-HCl pH 7.5, 100 mM NaCl, 30% sucrose, 0.25% Triton X-100) and centrifuged (35000 g 30 min). Chromatin containing pellets were suspended, washed twice with buffer D<sub>100</sub> and resuspended in buffer D<sub>600</sub> (25 mM Tris-HCl pH 7.5, 600 mM NaCl, 10% glycerol, 1 mM PMSF, proteinase inhibitor cocktail) and incubated for 5 min on ice. Following centrifugation (35000 g 10 min.) the supernatants (chromatin extracts) were collected.

### **Isolation of Replication Forks**

Cells at log phase with or without HU treatment of 3 hrs were crosslinked with 1% formaldehyde (Sigma, F8775) at 25°C for 8 min and stopped by adding 1/20 volume of 2.5 M glycine. Chromatin was obtained and sonicated with 6 bursts of 150 W for 10 s, with 1 min intervals

between pulses. The size of the sheared DNA fragments was between 300-1000 bp. The sheared chromatin sample was incubated with anti-Flag M2 beads (Sigma, A2220) for 3 h at 4 °C. Following extensive washing, with 1 x PBS buffer the immunoprecipitated chromatin was eluted with 200 ng/ul 3X Flag peptide, and the eluted fraction, supplemented with 1 x TES (50 mM Tris-HCl, pH 7.4, 1 mM EDTA, 2% SDS), was incubated at 65°C for 2 hrs for reversing crosslinking and then subjected to quantification of the indicated proteins.

### **Expression and Purification of *S. pombe* Cds1**

*cds1*<sup>+</sup> was cloned into plasmid pSSB-Y1 containing an 8his-T7SSB tag (C-terminal) for affinity purification. The Cds1-8his-T7SSB fusion protein was overexpressed in *S. pombe* using EMM medium without thiamine (13 hours) and cells were treated with 12.5 mM HU for a further 3 hr. Cells were broken by Lyticase treatment and resuspended in D<sub>100</sub> buffer supplemented with 1% Triton X-100, 50 mM NaF and 1 mM Na<sub>3</sub>VO<sub>4</sub>. Insoluble material was removed by centrifugation (35000 g, 30 min, 4 °C) and solid ammonium sulphate was added to the supernatant to 30% saturation then centrifuged (35000 g, 10 min, 4 °C). The ammonium sulphate was adjusted to 40% in the supernatant fraction. Precipitated protein was collected by centrifugation (35000 g, 30 min, 4 °C) and resuspended in D<sub>100</sub> buffer + 50 mM NaF+1 mM Na<sub>3</sub>VO<sub>4</sub>. The soluble fraction was purified by gel filtration, a Ni-NTA (QIAGEN column) and ssDNA cellulose elution. Fractions containing Cds1 were pooled and dialyzed against buffer D<sub>100</sub> and stored at -80°C.

## **The Overexpression and Purification of *S. pombe* Cdc45**

*cdc45*<sup>+</sup> was cloned into plasmid pMAL-c2X containing MBP (N-terminus) and 6His-tag (C-terminal) tags. *E. coli* BL21 (DE3) cells harboring the plasmid were cultured in LB at 37 °C to an  $A_{600\text{nm}}=0.3\sim 0.4$ . 1 mM IPTG was added and the culture incubated for 14 hours at 18 °C. Cells were harvested, washed with ddH<sub>2</sub>O and resuspended in buffer D<sub>100</sub>. After cell lysis by sonication, insoluble materials were removed by centrifugation (35000g, 30 min, 4 °C). The supernatant was incubated with Amylose Resin (NEB, E8021L) for 1 hour and eluted with D<sub>100</sub> buffer containing 10 mM maltose. Eluted fractions containing Cdc45 were pooled and mixed with Ni-NTA resin for 30 min at 4 °C. The resin was washed with D<sub>100</sub> supplemented with 20 mM imidazole, and Cdc45 eluted with a gradient of buffer D<sub>100</sub>/20 mM imidazole to buffer D<sub>100</sub>/250 mM imidazole. Fractions containing Cdc45 were pooled, dialyzed against buffer D<sub>100</sub>, and stored at -80 °C.

## ***In vitro* Phosphorylation of Cdc45 by Cds1**

5 pmol of purified MBP-Cdc45-6his was mixed with 20 pmol of purified Cds1-8his-3HA in 20 μl of buffer (10 mM HEPES-NaOH pH 7.5, 75 mM KCl, 1 mM DTT, 4 mM MgCl<sub>2</sub>, 0.5 mM EDTA, 0.1 mM PMSF, 20 μCi [ $\gamma$ -<sup>32</sup>P]-ATP (Perkin Elmer) and 0.1 mM ATP) and incubated for 30 min at 30°C. The reaction was stopped by adding SDS loading buffer and boiled at 95 °C for 5 min. Cdc45 proteins were separated by 8% SDS-PAGE gel, fixed with 5% methanol and dried for autoradiography.



## Isolation of Replicative Helicase CMG Complex from Chromatin

Five expression plasmids were constructed and integrated into specific genomic loci in one strain: *ars1::(nmt1-cdc45<sup>WT/3A/3D/3E</sup>-Flag)*, *arg3::(nmt1-sld5, mcm2, mcm3)*, *ade6::(nmt1-mcm5, mcm6)*, *leu2::(nmt1-mcm7, psf2-8his-3HA)*, and *leu1::(nmt1-psf1, psf3, mcm4)*. The five plasmids are listed in Table S2. Cells expressing the CMG complex were grown in EMM medium at 26°C for 24 hr. 100 liters of culture were harvested and chromatin isolated (see above). Chromatin was resuspended in buffer D<sub>100</sub> and broken by sonication. Insoluble material was removed by centrifugation (35000 g, 30 min, 4°C), 0.5 mM CaCl<sub>2</sub> + 1 mM MgCl<sub>2</sub> + 5000 units of DNase I + proteinase inhibitors + phosphatase inhibitors cocktail (Merck) were added to the supernatant and mixed with 500 µl of anti-Flag M2 beads (Sigma, A2220) for 2 hours at 4°C. Beads were washed with buffer D<sub>200</sub> (buffer D<sub>100</sub> plus 100 mM NaCl). CMG complex was eluted in buffer D<sub>100</sub> supplemented with 0.4 mg/ml 3×Flag peptide. The fractions containing CMG complex were pooled and mixed with 40 µl of anti-HA-Agarose beads (Sigma, A2095) at 4°C for 3 hours. Beads were washed with buffer D<sub>100</sub> and subsequently used in the *in vitro* assay of CMG helicase activity.

## Phos-tag SDS-PAGE

Chromatin extracts were separated using Phos-tag SDS-PAGE (6% w/v polyacrylamide, 50 µM Phos-tag acrylamide (Wako Chemicals), 100 µM MnCl<sub>2</sub>). The gel was dialyzed against transfer buffer + 10 mM EDTA for three times (60 min), and then immunoblotted.

## **Preparation of Specific Antibodies Against Phosphorylated Cdc45 at S275, S322, or S397**

### **Site**

Peptides used for generating antibodies against phosphorylated Cdc45 S275, S322, or S397 are listed in Table S3. Phosphorylated S275, S322, or S397 peptides (GL Biochem) were conjugated with keyhole limpet hemocyanin (KLH) and injected into rabbits. Crude serum was affinity purified by adding phosphorylated peptides crosslinked to CNBr-activated Sepharose resin, washing with D<sub>100</sub> and eluting with 100 mM Glycine-HCl (pH 2.5) followed by immediate neutralization with 1 M Tris-HCl (pH 8.0). Fractions containing antibody were pooled and applied to an equivalent unmodified peptide column and the flow-through collected and dialyzed against phosphate buffered saline (PBS). 50% (v/v) glycerol was added into the purified antibodies and stored at -20 °C.

### **EdU Incorporation and Detection**

10 μM EdU was added to cultures for indicated the time periods. For EdU detection, cells were fixed with 70% ethanol and treated with the AlexaFluor 488, 555, or 647 Click-iT kit (Invitrogen) following the manufacturers' instructions. Treated cells were washed twice with PBS+3% bovine serum albumin (BSA) and sonicated softly in PBS +10 μg/ml RNase A+1 μg/ml RNase T1. Cells were the subject to FACS analysis.

### **Single Molecule-based DNA Combing**

For single-color DNA combing assay, a concentration of 10 μM EdU was used. For IdU/CldU

dual-color labelling, 2.5  $\mu\text{M}$  IdU and 50  $\mu\text{M}$  CldU were used. For detection: 10 ml of cells were harvested and embedded in 0.65% low melting-point agarose plugs. Cell walls were removed using lyticase and proteins digested with Proteinase K and plugs were extensively washed in TE the MES buffer (pH 6.3) and agarose was digested with  $\beta$ -Agarase I. Genomic DNA fibers were stretched and adhered to silanized glass coverslips (Genomic Vision, COV-001). After heat crosslinking (60 °C for 2 hours) labeled DNA fibers were detected as follows: EdU detection, coverslips were treated with PBS and labeled with AlexaFlour 555 using a Click-iT kit using the manufacturers' instructions. IdU/CldU, DNA fibers were denatured in 1 M NaOH for 20~22 min and neutralized by washing in PBS 5 times. Slides were blocked with PBS+3% BSA+0.02% Tween-20 for 35 min and incubated with anti-IdU (BD, 347580, 1:200) and anti-CldU antibodies (Lifespan Bioscience, C188215, 1:50) for 35 min. DNA Fibers were washed in PBS and incubated with secondary antibody (Molecular probes, A11030 and A11006, 1:200) for 35 min. After washing with PBS slides were mounted in SlowFade Gold with DAPI (Invitrogen, S36939). DNA fibers were imaged on a Delta Vision Elite microscope (Applied Precision) using a 1.4 NA 60 $\times$  lens. 10 z axis sections were deconvolved and projected using softWoRx (Applied Precision). DNA fibers images were analyzed using Volocity (Perkin Elmer). A minimum of 500 DNA fibers per sample were scored. The data were evaluated for statistical significance using  $\chi^2$ , 2-tailed Z statistics and Mann-Whitney Test.

### **Rad52 Foci**

5 ml of cell culture either untreated or treated with HU at the indicated concentration was harvested, fixed with cold 70% ethanol (1 hour), washed extensively with PBS and mounted in

SlowFade Gold with DAPI. Rad52 foci were imaged on a Delta Vision Elite microscope with a 100× lens. 10 z axis sections were deconvolved and projected as described above. >3000 cells per sample from 2 to 4 independent experiments were analyzed.

### ***In vitro* CMG Helicase Activity**

TTTTTTTTTTTTTTTTTTTTTTTTTTTTTTTTTTTTTTTTTTTTTTTTTTTTTTTTTTTTTTTGATTAAGTTGG  
GTAACGCCAGGGTTTTCCCAGTCACGAC oligonucleotide was synthesized and labelled with <sup>32</sup>P at its 5'-end and annealed to M13mp18 ssDNA circular DNA (3'-39 nucleotides homology) to provide a substrate for the CMG helicase. 1 pmol of purified CMG complex plus 0.5 nM radiolabeled substrates were mixed in buffer (25 mM HEPES-NaOH, pH 7.5, 10 mM Magnesium acetate, 50 mM sodium acetate, 1 mM DTT, 40 µg/ml BSA, 4 mM ATP) and incubated at 30 °C for 30 min. The reaction was stopped by adding loading dye containing 0.1% SDS and 10 mM EDTA. Reaction products were separated by 8% native PAGE. The gel was washed with 0.5× TBE, mounted on Whatman 3MM paper and dried for autoradiography.

**Table 1. *S. pombe* Strains Used in This Study**

| <b>Strains</b> | <b>Genotype</b>                                                                                                                  | <b>Source</b> |
|----------------|----------------------------------------------------------------------------------------------------------------------------------|---------------|
| LD330          | <i>h-</i> , <i>ura4-D18</i>                                                                                                      | Lilin Du      |
| LY01           | <i>h-</i> , <i>ura4-D18</i> , <i>cdc45-R319I:ura4</i>                                                                            | This Study    |
| LY02           | <i>h-</i> , <i>ura4-D18</i> , <i>ura4:cdc45-R319I</i>                                                                            | This Study    |
| LY03           | <i>h-</i> , <i>ura4-D18</i> , <i>cdc45-S275A:ura4</i>                                                                            | This Study    |
| LY04           | <i>h-</i> , <i>ura4-D18</i> , <i>cdc45-S275D:ura4</i>                                                                            | This Study    |
| LY05           | <i>h-</i> , <i>ura4-D18</i> , <i>cdc45-S322A:ura4</i>                                                                            | This Study    |
| LY06           | <i>h-</i> , <i>ura4-D18</i> , <i>cdc45-S322D:ura4</i>                                                                            | This Study    |
| LY07           | <i>h-</i> , <i>ura4-D18</i> , <i>cdc45-S397A:ura4</i>                                                                            | This Study    |
| LY08           | <i>h-</i> , <i>ura4-D18</i> , <i>cdc45-S397D:ura4</i>                                                                            | This Study    |
| LY09           | <i>h-</i> , <i>ura4-D18</i> , <i>cdc45-S275A S322A S397A:ura4</i>                                                                | This Study    |
| LY10           | <i>h-</i> , <i>ura4-D18</i> , <i>cdc45-S275D S322D S397D:ura4</i>                                                                | This Study    |
| LY11           | <i>h-</i> , <i>ura4-D18</i> , <i>cdc45-S275E S322E S397E:ura4</i>                                                                | This Study    |
| LY12           | <i>h-</i> , <i>ura4-D18</i> , <i>cdc45-S275T S322T S397T:ura4</i>                                                                | This Study    |
| LY13           | <i>h-</i> , <i>ura4-D18</i> , <i>cdc45::cdc45-8his-3HA</i>                                                                       | This Study    |
| LY14           | <i>h-</i> , <i>ura4-D18</i> , <i>cdc45::cdc45-S275A S322A S397A-8his-3HA</i>                                                     | This Study    |
| Ets13          | <i>h+</i> , <i>ade6-704</i> , <i>cds1::kanMX6</i> , <i>leu1-32</i> , <i>ura4-D18</i>                                             | A. M. Carr    |
| LY15           | <i>h+</i> , <i>ade6-704</i> , <i>cds1::kanMX6</i> , <i>leu1-32</i> , <i>ura4-D18</i> , <i>cdc45-R319I:ura4</i>                   | This Study    |
| LY16           | <i>h+</i> , <i>ade6-704</i> , <i>cds1::kanMX6</i> , <i>leu1-32</i> , <i>ura4-D18</i> , <i>ura4:cdc45-R319I</i>                   | This Study    |
| LY17           | <i>h+</i> , <i>ade6-704</i> , <i>cds1::kanMX6</i> , <i>leu1-32</i> , <i>ura4-D18</i> , <i>cdc45::cdc45-8his-3HA</i>              | This Study    |
| LY18           | <i>h+</i> , <i>ade6-704</i> , <i>cds1::kanMX6</i> , <i>leu1-32</i> , <i>ura4-D18</i> , <i>cdc45::cdc45-S275A S322A S397A-3HA</i> | This Study    |
| LY24           | <i>h+</i> , <i>ade6-704</i> , <i>cds1::kanMX6</i> , <i>leu1-32</i> , <i>ura4-D18</i> , <i>cdc45-S275A:ura4</i>                   | This Study    |
| LY25           | <i>h+</i> , <i>ade6-704</i> , <i>cds1::kanMX6</i> , <i>leu1-32</i> , <i>ura4-D18</i> , <i>cdc45-S275D:ura4</i>                   | This Study    |
| LY26           | <i>h+</i> , <i>ade6-704</i> , <i>cds1::kanMX6</i> , <i>leu1-32</i> , <i>ura4-D18</i> , <i>cdc45-S322A:ura4</i>                   | This Study    |
| LY27           | <i>h+</i> , <i>ade6-704</i> , <i>cds1::kanMX6</i> , <i>leu1-32</i> , <i>ura4-D18</i> , <i>cdc45-S322D:ura4</i>                   | This Study    |
| LY28           | <i>h+</i> , <i>ade6-704</i> , <i>cds1::kanMX6</i> , <i>leu1-32</i> , <i>ura4-D18</i> , <i>cdc45-S397A:ura4</i>                   | This Study    |
| LY29           | <i>h+</i> , <i>ade6-704</i> , <i>cds1::kanMX6</i> , <i>leu1-32</i> , <i>ura4-D18</i> , <i>cdc45-S397D:ura4</i>                   | This Study    |
| LY30           | <i>h+</i> , <i>ade6-704</i> , <i>cds1::kanMX6</i> , <i>leu1-32</i> , <i>ura4-D18</i> , <i>cdc45-S275A S322A S397A:ura4</i>       | This Study    |
| LY31           | <i>h+</i> , <i>ade6-704</i> , <i>cds1::kanMX6</i> , <i>leu1-32</i> , <i>ura4-D18</i> , <i>cdc45-S275D S322D S397D:ura4</i>       | This Study    |

|       |                                                                                                                                                                                                                                                      |            |
|-------|------------------------------------------------------------------------------------------------------------------------------------------------------------------------------------------------------------------------------------------------------|------------|
| LY32  | <i>h+</i> , <i>ade6-704</i> , <i>cds1::kanMX6</i> , <i>leu1-32</i> , <i>ura4-D18</i> , <i>cdc45-S275E S322E S397E:ura4</i>                                                                                                                           | This Study |
| LY33  | <i>h+</i> , <i>ade6-704</i> , <i>cds1::kanMX6</i> , <i>leu1-32</i> , <i>ura4-D18</i> , <i>cdc45-S275T S322T S397T:ura4</i>                                                                                                                           | This Study |
| LY34  | <i>h-</i> , <i>ade6-704</i> , <i>chk1::kanMX6</i> , <i>leu1-32</i> , <i>ura4-D18</i> , <i>cdc45::cdc45-8his-3HA</i>                                                                                                                                  | This Study |
| LY35  | <i>h-</i> , <i>ura4-D18</i> , <i>rad3::kanMX6</i> , <i>cdc45::cdc45-8his-3HA</i>                                                                                                                                                                     | This Study |
| J2172 | <i>h-</i> , <i>smt0</i> , <i>leu1-32</i> , <i>ura4-D18</i> , <i>ade6-704</i> , <i>leu1::[leu1-adh:hENT1]</i> , <i>his7+</i> , <i>adh1::hsv-TK</i> , <i>cdc10-m17</i>                                                                                 | A.M. Carr  |
| LY36  | <i>h-</i> , <i>smt0</i> , <i>leu1-32</i> , <i>ura4-D18</i> , <i>ade6-704</i> , <i>leu1::[leu1-adh:hENT1]</i> , <i>his7+</i> , <i>adh1::hsv-TK</i> , <i>cdc10-m17</i> , <i>cdc45-R319I:ura4</i>                                                       | This Study |
| LY37  | <i>h-</i> , <i>smt0</i> , <i>leu1-32</i> , <i>ura4-D18</i> , <i>ade6-704</i> , <i>leu1::[leu1-adh:hENT1]</i> , <i>his7+</i> , <i>adh1::hsv-TK</i> , <i>cdc10-m17</i> , <i>cdc45-S275A S322A S397A:ura4</i>                                           | This Study |
| LY38  | <i>h-</i> , <i>smt0</i> , <i>leu1-32</i> , <i>ura4-D18</i> , <i>ade6-704</i> , <i>leu1::[leu1-adh:hENT1]</i> , <i>his7+</i> , <i>adh1::hsv-TK</i> , <i>cdc10-m17</i> , <i>cdc45-S275D S322D S397D:ura4</i>                                           | This Study |
| LY39  | <i>h-</i> , <i>smt0</i> , <i>leu1-32</i> , <i>ura4-D18</i> , <i>ade6-704</i> , <i>leu1::[leu1-adh:hENT1]</i> , <i>his7+</i> , <i>adh1::hsv-TK</i> , <i>cdc10-m17</i> , <i>cds1::hphMX</i>                                                            | This Study |
| LY40  | <i>h-</i> , <i>smt0</i> , <i>leu1-32</i> , <i>ura4-D18</i> , <i>ade6-704</i> , <i>leu1::[leu1-adh:hENT1]</i> , <i>his7+</i> , <i>adh1::hsv-TK</i> , <i>cdc10-m17</i> , <i>cds1::hphMX</i> , <i>cdc45-S275A S322A S397A:ura4</i>                      | This Study |
| LY41  | <i>h-</i> , <i>smt0</i> , <i>leu1-32</i> , <i>ura4-D18</i> , <i>ade6-704</i> , <i>leu1::[leu1-adh:hENT1]</i> , <i>his7+</i> , <i>adh1::hsv-TK</i> , <i>cdc10-m17</i> , <i>cds1::hphMX</i> , <i>cdc45-S275D S322D S397D:ura4</i>                      | This Study |
| LY42  | <i>h-</i> , <i>ura4-D18</i> , <i>rad22-GFP:kanMX6</i>                                                                                                                                                                                                | This Study |
| LY43  | <i>h-</i> , <i>ura4-D18</i> , <i>cdc45-S275A S322A S397A:ura4</i> , <i>rad22-GFP:kanMX6</i>                                                                                                                                                          | This Study |
| LY44  | <i>h-</i> , <i>ura4-D18</i> , <i>cdc45-S275D S322D S397D:ura4</i> , <i>rad22-GFP:kanMX6</i>                                                                                                                                                          | This Study |
| LY45  | <i>h-</i> , <i>ura4-D18</i> , <i>cds1::hphMX</i> , <i>rad22-GFP:kanMX6</i>                                                                                                                                                                           | This Study |
| LY46  | <i>h-</i> , <i>ura4-D18</i> , <i>cds1::hphMX</i> , <i>cdc45-S275A S322A S397A:ura4</i> , <i>rad22-GFP:kanMX6</i>                                                                                                                                     | This Study |
| LY47  | <i>h-</i> , <i>ura4-D18</i> , <i>cds1::hphMX</i> , <i>cdc45-S275D S322D S397D:ura4</i> , <i>rad22-GFP:kanMX6</i>                                                                                                                                     | This Study |
| TK8   | <i>h+</i> , <i>leu1-32</i> , <i>ura4-D18</i> , <i>ade6-M216</i>                                                                                                                                                                                      | Our stocks |
| LY48  | <i>h+</i> , <i>leu1-32</i> , <i>ura4-D18</i> , <i>ade6-M216</i> , <i>ars1:(nmt1-cdc45-Flag)</i> , <i>arg3:(nmt1-sld5, mcm2, mcm3)</i> , <i>ade6:(nmt1-mcm5, mcm6)</i> , <i>leu2:(nmt1-mcm7, psf2-8his-3HA)</i> , <i>leu1:(nmt1-psf1, psf3, mcm4)</i> | This Study |
| LY49  | <i>h+</i> , <i>leu1-32</i> , <i>ura4-D18</i> , <i>ade6-M216</i> , <i>cdc45::cdc45-8his-3HA</i> , <i>spb70::spb70-3Flag</i>                                                                                                                           | This Study |

|      |                                                                                                                                                 |            |
|------|-------------------------------------------------------------------------------------------------------------------------------------------------|------------|
| LY50 | <i>h+</i> , <i>leu1-32</i> , <i>ura4-D18</i> , <i>ade6-M216</i> , <i>cdc45::cdc45-8his-3HA</i> , <i>cdc1::cdc1-3Flag</i>                        | This Study |
| LY51 | <i>h+</i> , <i>leu1-32</i> , <i>ura4-D18</i> , <i>ade6-M216</i> , <i>cdc45::cdc45-8his-3HA</i> , <i>pol2::pol2-3Flag</i>                        | This Study |
| LY52 | <i>h+</i> , <i>ade6-704</i> , <i>cds1::kanMX6</i> , <i>leu1-32</i> , <i>ura4-D18</i> , <i>cdc45::cdc45-8his-3HA</i> , <i>spb70::spb70-3Flag</i> | This Study |
| LY53 | <i>h+</i> , <i>ade6-704</i> , <i>cds1::kanMX6</i> , <i>leu1-32</i> , <i>ura4-D18</i> , <i>cdc45::cdc45-8his-3HA</i> , <i>cdc1::cdc1-3Flag</i>   | This Study |
| LY54 | <i>h+</i> , <i>ade6-704</i> , <i>cds1::kanMX6</i> , <i>leu1-32</i> , <i>ura4-D18</i> , <i>cdc45::cdc45-8his-3HA</i> , <i>pol2::pol2-3Flag</i>   | This Study |
| LY55 | <i>h-</i> , <i>ura4-D18</i> , <i>ssb1-GFP:kanMX6</i>                                                                                            | This Study |
| LY56 | <i>h-</i> , <i>ura4-D18</i> , <i>cdc45-S275A S322A S397A:ura4</i> , <i>ssb1-GFP:kanMX6</i>                                                      | This Study |
| LY57 | <i>h-</i> , <i>ura4-D18</i> , <i>cdc45-S275D S322D S397D:ura4</i> , <i>ssb1-GFP:kanMX6</i>                                                      | This Study |
| LY58 | <i>h-</i> , <i>ura4-D18</i> , <i>cds1::hphMX</i> , <i>ssb1-GFP:kanMX6</i>                                                                       | This Study |
| LY59 | <i>h-</i> , <i>ura4-D18</i> , <i>cds1::hphMX</i> , <i>cdc45-S275A S322A S397A:ura4</i> , <i>ssb1-GFP:kanMX6</i>                                 | This Study |
| LY60 | <i>h-</i> , <i>ura4-D18</i> , <i>cds1::hphMX</i> , <i>cdc45-S275D S322D S397D:ura4</i> , <i>ssb1-GFP:kanMX6</i>                                 | This Study |
| LY61 | <i>h-</i> , <i>ura4-D18</i> , <i>cdc45-S275C S322C S397C:ura4</i>                                                                               | This Study |
| LY62 | <i>h-</i> , <i>ura4-D18</i> , <i>cdc45-S275K S322K S397K:ura4</i>                                                                               | This Study |
| LY63 | <i>h-</i> , <i>ura4-D18</i> , <i>cdc45-S275N S322N S397N:ura4</i>                                                                               | This Study |
| LY64 | <i>h-</i> , <i>ura4-D18</i> , <i>cdc45-S275G S322G S397G:ura4</i>                                                                               | This Study |
| LY65 | <i>h-</i> , <i>ura4-D18</i> , <i>cdc45-S275V S322V S397V:ura4</i>                                                                               | This Study |
| LY66 | <i>h+</i> , <i>ade6-704</i> , <i>cds1::kanMX6</i> , <i>leu1-32</i> , <i>ura4-D18</i> , <i>cdc45-S275C S322C S397C:ura4</i>                      | This Study |
| LY67 | <i>h+</i> , <i>ade6-704</i> , <i>cds1::kanMX6</i> , <i>leu1-32</i> , <i>ura4-D18</i> , <i>cdc45-S275K S322K S397K:ura4</i>                      | This Study |
| LY68 | <i>h+</i> , <i>ade6-704</i> , <i>cds1::kanMX6</i> , <i>leu1-32</i> , <i>ura4-D18</i> , <i>cdc45-S275N S322N S397N:ura4</i>                      | This Study |
| LY69 | <i>h+</i> , <i>ade6-704</i> , <i>cds1::kanMX6</i> , <i>leu1-32</i> , <i>ura4-D18</i> , <i>cdc45-S275G S322G S397G:ura4</i>                      | This Study |
| LY70 | <i>h+</i> , <i>ade6-704</i> , <i>cds1::kanMX6</i> , <i>leu1-32</i> , <i>ura4-D18</i> , <i>cdc45-S275V S322V S397V:ura4</i>                      | This Study |

**Table 2. Plasmids Used in This Study**

| <b>Plasmid</b>                             | <b>Description</b>                                                               | <b>Source</b>  |
|--------------------------------------------|----------------------------------------------------------------------------------|----------------|
| pFa6a                                      | containing kanMX6                                                                | Susan Forsburg |
| pBluescript                                | vector for cloning                                                               | Stratagene     |
| pSLF1072                                   | vector for protein overexpression controlled by nmt1 promoter in <i>S. pombe</i> | Susan Forsburg |
| pSSB-Y1                                    | vector for protein overexpression controlled by nmt1 promoter in <i>S. pombe</i> | Daochun Kong   |
| pBlue-ura4                                 | ura4 were cloned into pBlue at Hind III site                                     | This study     |
| pBlue-hph                                  | hph were cloned into pBlue at EcoR V and Hind III site                           | This study     |
| pBlue-nat                                  | nat were cloned into pBlue at EcoR V and Hind III site                           | This study     |
| pBlue-leu1                                 | leu1 were cloned into pBlue at EcoR I and BamH I site                            | This study     |
| pBlue-ura4-cdc45                           | cdc45 were cloned at Kpn I and SalI, for replacing cdc45 gene in genome          | This study     |
| pBlue-ura4- <i>cdc45-R319I</i>             | containing <i>cdc45-R319I</i> , for replacing cdc45 gene in genome               | This study     |
| pBlue-ura4- <i>cdc45-S275A</i>             | containing <i>cdc45-S275A</i> , for replacing cdc45 gene in genome               | This study     |
| pBlue-ura4- <i>cdc45-S275D</i>             | containing <i>cdc45-S275D</i> , for replacing cdc45 gene in genome               | This study     |
| pBlue-ura4- <i>cdc45-S275T</i>             | containing <i>cdc45-S275T</i> , for replacing cdc45 gene in genome               | This study     |
| pBlue-ura4- <i>cdc45-S322A</i>             | containing <i>cdc45-S322A</i> , for replacing cdc45 gene in genome               | This study     |
| pBlue-ura4- <i>cdc45-S322D</i>             | containing <i>cdc45-S322D</i> , for replacing cdc45 gene in genome               | This study     |
| pBlue-ura4- <i>cdc45-S322T</i>             | containing <i>cdc45-S322T</i> , for replacing cdc45 gene in genome               | This study     |
| pBlue-ura4- <i>cdc45-S397A</i>             | containing <i>cdc45-S397A</i> , for replacing cdc45 gene in genome               | This study     |
| pBlue-ura4- <i>cdc45-S397D</i>             | containing <i>cdc45-S397D</i> , for replacing cdc45 gene in genome               | This study     |
| pBlue-ura4- <i>cdc45-S397T</i>             | containing <i>cdc45-S397T</i> , for replacing cdc45 gene in genome               | This study     |
| pBlue-ura4- <i>cdc45-S275A S322A S397A</i> | containing <i>cdc45-S275A S322A S397A</i> , for replacing cdc45 gene in genome   | This study     |



|                                                     |                                                                                                                                                                                                         |            |
|-----------------------------------------------------|---------------------------------------------------------------------------------------------------------------------------------------------------------------------------------------------------------|------------|
| pBlue-ura4- <i>cdc45-S275D S322D S397D</i>          | containing <i>cdc45-S275D S322D S397D</i> , for replacing <i>cdc45</i> gene in genome                                                                                                                   | This study |
| pBlue-ura4- <i>cdc45-S275E S322E S397E</i>          | containing <i>cdc45-S275E S322E S397E</i> , for replacing <i>cdc45</i> gene in genome                                                                                                                   | This study |
| pBlue-ura4- <i>cdc45-S275T S322T S397T</i>          | containing <i>cdc45-S275T S322T S397T</i> , for replacing <i>cdc45</i> gene in genome                                                                                                                   | This study |
| pBlue-ura4- <i>cdc45-8his-3HA</i>                   | <i>cdc45</i> tagged with -8his-3HA at C-terminal                                                                                                                                                        | This study |
| pBlue-ura4- <i>cdc45-S275A S322A S397A-8his-3HA</i> | <i>cdc45-S275A S322A S397A</i> tagged with -8his-3HA at C-terminal                                                                                                                                      | This study |
| pSLF1072- <i>cdc45-flag</i>                         | <i>cdc45</i> tagged with -flag at C-terminal, cloned at Xho I and Sma I                                                                                                                                 | This study |
| pBlue-leu1- <i>psf1-psf3-mcm4</i>                   | <i>psf1</i> , <i>psf3</i> and <i>mcm4</i> were controlled by <i>nmt1</i> promoter, <i>psf1</i> were cloned at EcoR I, <i>psf3</i> were at Kpn I and <i>mcm4</i> were at Sac I                           | This study |
| pBlue-hph- <i>sld5-arg3-mcm2-mcm3</i>               | <i>sld5</i> , <i>mcm2</i> and <i>mcm3</i> were controlled by <i>nmt1</i> promoter, <i>sld5</i> were cloned at Sal I, <i>mcm2</i> were at Kpn I, <i>mcm3</i> were at Not I and <i>arg3</i> were at Sac I | This study |
| pBlue-nat- <i>mcm5-mcm6-ade6</i>                    | <i>mcm5</i> and <i>mcm6</i> were controlled by <i>nmt1</i> promoter, <i>mcm5</i> were cloned at Apa I, <i>mcm6</i> were at Sal I and <i>ade6</i> were at Sac I                                          | This study |
| pFa6a- <i>psf2-mcm7-leu2</i>                        | <i>psf2</i> and <i>mcm7</i> were controlled by <i>nmt1</i> promoter, <i>psf2</i> were cloned at EcoR I and Pme I, <i>mcm7</i> were at Bgl II and <i>leu2</i> were at Asc I                              | This study |
| pBlue-ura4- <i>cdc45-S275C S322C S397C</i>          | containing <i>cdc45-S275C S322C S397C</i> , for replacing <i>cdc45</i> gene in genome                                                                                                                   | This study |
| pBlue-ura4- <i>cdc45-S275K S322K S397K</i>          | containing <i>cdc45-S275K S322K S397K</i> , for replacing <i>cdc45</i> gene in genome                                                                                                                   | This study |
| pBlue-ura4- <i>cdc45-S275N S322N S397N</i>          | containing <i>cdc45-S275N S322N S397N</i> , for replacing <i>cdc45</i> gene in genome                                                                                                                   | This study |
| pBlue-ura4- <i>cdc45-S275G S322G S397G</i>          | containing <i>cdc45-S275G S322G S397G</i> , for replacing <i>cdc45</i> gene in genome                                                                                                                   | This study |
| pBlue-ura4- <i>cdc45-S275V S322V S397V</i>          | containing <i>cdc45-S275V S322V S397V</i> , for replacing <i>cdc45</i> gene in genome                                                                                                                   | This study |

**Table 3. The Sequences of Peptides Used for the Generation of Specific Antibodies against Phosphorylated S275, S322 and S397 in Cdc45**

| Phosphorylation sites | Sequence (N- to C- terminal) | Purity | Note                  |
|-----------------------|------------------------------|--------|-----------------------|
| S275                  | NRSYpSLLKDEVNRC-KLH          | >95%   | Immunizing Rabbit     |
|                       | NRSYpSLLKDEVNRC              | >95%   | Antibody purification |
|                       | NRSYSLLKDEVNRC               | >95%   | Antibody purification |
| S322                  | RHWpSLYDSMLHSC-KLH           | >95%   | Immunizing Rabbit     |
|                       | RHWpSLYDSMLHSC               | >95%   | Antibody purification |
|                       | RHWSLYDSMLHSC                | >95%   | Antibody purification |
| S397                  | DDVIFHpSFTRTYC-KLH           | >95%   | Immunizing Rabbit     |
|                       | DDVIFHpSFTRTYC               | >95%   | Antibody purification |
|                       | DDVIFHSFTRTYC                | >95%   | Antibody purification |

**Table 4. Antibodies Used in This Study**

| Epitope        | Manufacturer             | Use                 | Note                     |
|----------------|--------------------------|---------------------|--------------------------|
| HA             | Sigma(H3663)             | IB:1:1000; IP:1:200 | Primary antibody; mouse  |
| Flag           | MBL Life Science(M1853L) | IB:1:5000           | Primary antibody; mouse  |
| spCdc45-S275ph | In-lab                   | IB:1:500            | Primary antibody; rabbit |
| spCdc45-S322ph | In-lab                   | IB:1:500            | Primary antibody; rabbit |
| spCdc45-S397ph | In-lab                   | IB:1:300            | Primary antibody; rabbit |
| spCdc45        | In-lab                   | IB:1:1000           | Primary antibody; rabbit |
| spMcm3         | In-lab                   | IB:1:1000           | Primary antibody; rabbit |
| spMcm4         | In-lab                   | IB:1:1000           | Primary antibody; rabbit |
| spMcm7         | In-lab                   | IB:1:5000           | Primary antibody; rabbit |
| spPsf1         | In-lab                   | IB:1:1000           | Primary antibody; rabbit |
| spH2B          | In-lab                   | IB:1:5000           | Primary antibody; rabbit |
| spPCNA         | In-lab                   | IB:1:2000           | Primary antibody; rabbit |

|                          |                                 |            |                                         |
|--------------------------|---------------------------------|------------|-----------------------------------------|
| spPol3                   | In-lab                          | IB:1:2000  | Primary antibody;<br>rabbit             |
| spH3                     | Bioeasytech (BE3015)            | IB:1:5000  | Primary antibody;<br>mouse              |
| CldU                     | Lifespan<br>Bioscience(C188215) | IF:1:50    | Primary antibody;<br>rat                |
| IdU                      | BD(347580)                      | IF:1:200   | Primary antibody;<br>mouse              |
| BrdU                     | Abcam (ab6326)                  | IF: 1:50   | Primary antibody,<br>rat                |
| ssDNA                    | Millipore(MAB3868)              | IF:1:50    | Primary antibody;<br>mouse              |
| Alexa Fluor<br>546       | Molecular<br>probes(A11030)     | IF:1:200   | Secondary antibody;<br>goat anti-mouse  |
| Alexa Fluor<br>488       | Molecular<br>probes(A11006)     | IF:1:200   | Secondary antibody;<br>goat anti-rat    |
| Alexa Fluor<br>488 azide | Molecular<br>probes(C10337)     |            | EdU conjugates                          |
| IgG                      | Bioeasytech(BE0101)             | IB:1:10000 | Secondary antibody;<br>goat anti-rabbit |
| IgG                      | Bioeasytech(BE0102)             | IB:1:10000 | Secondary antibody;<br>goat anti-mouse  |
| Anti-Flag beads          | Sigma(A2220)                    | -          | -                                       |
| Anti-HA beads            | Sigma(A2095)                    | -          | -                                       |

## Supplementary figure legends

**Fig. S1.** Screen for mutants that rescue Cds1 deficiency.

(A) Spontaneous genetic mutations were selected that render Cds1<sup>Chk2-</sup> cells resistant to hydroxyurea. Top: wild type cells (WT) are resistant to HU. Bottom: *cds1*<sup>-</sup> cells are sensitive to 5 mM HU, but a few dozen (of  $1 \times 10^6$ ) cells form colonies. (B) Schematic of screening strategy. (C) Five-fold serial dilution assays of representative mutants that grew on the 5mM HU. WT (*cds1*<sup>Chk2+</sup>), *cds1*<sup>-</sup> (*cds1*<sup>Chk2</sup> $\Delta$ ). Genomic DNA was isolated and subjected to deep sequencing to determine which genes were mutated. (D) Serial dilution assay of diploid heterozygous cells showing that *cdc45-R319I* is recessive. (E) Mass spectrometry traces of Cdc45 isolated from HU-treated cells showing phosphorylation on S275, S322 and S397. The phosphorylated peptides of Cdc45 protein were shown. (F) Western blotting against serine-phosphorylated peptides and control un-phosphorylated peptides to characterize the three antibodies that specifically recognize phosphorylated S275, S322 and S397. (G) Conservation of the Cdc45 S275, S322 and S397 residues from yeast to *H. sapiens*. Top: Domain structure of Cdc45. S275, S322 and S397 sites are located in the MCM and GINS interaction domain (CID). Bottom: Clustal Omega alignments S275, S322 and S397 are indicated by a solid arrow. Open arrow: nearby serine and threonine residues in human Cdc45. (H, I) Five-fold serial dilution assays of the mutants *cdc45-3A*, *cdc45-3D*, *cdc45-3E*, *cdc45-3C*, *cdc45-3K*, *cdc45-3V*, *cdc45-3N*, *cdc45-3G*, and *cdc45-3T* under the presence or absence of HU in the checkpoint-proficient or –deficient *cds1*<sup>Chk2</sup> $\Delta$  cells.

**Fig. S2.** Cell cycle progression and Rad52 foci during HU treatment and after release.

(A) FACS analysis of cells from Fig. 3A. The concentration of HU is 12.5 mM. (B) Representative images of the Rad52 recombinant protein foci.

**Fig. S3.** The length distributions of DNA fibers.

(A) Representative DNA fibers from combing experiments using the indicated strains during unperturbed growth, under replication stress (HU presence), or after HU release. (B) The frequencies of DNA fiber lengths from the indicated strains.

**Fig. S4.** *cdc45-3E* cells grow poorly.

(A) Growth of the indicated stains on YE plates. *cdc45-3E* cells had a very poor growth. (B) FACS analysis showed *cdc45-3E* cells have an abnormal DNA content. (C) Bright field and fluorescent imaging showing an abnormal phenotype for *cdc45-3E* cells.

**Fig. S5.** *cdc45-3A* cells have a normal level of Cdc45 protein.

(A) Western blots of *cdc45*<sup>+</sup> (WT) and *cdc45-3A* cells demonstrating an equal amount of Cdc45 protein in whole cell and chromatin extracts under normal cell conditions or during replication stress (HU). (B) Western blot of chromatin extracts following extraction of chromatin proteins with increasing salt concentration shows that the affinity of Cdc45-3A for chromatin is not changed, either in presence or absence of HU. (C) Western blot assay examining the amounts of Mcm3, Mcm4 and Psf1 CMG subunits on chromatin in presence or absence of HU. The formation of the CMG complex was not altered in *cdc45-3A* cells. (D) A five-fold serial dilution assays show that *cdc45-3T* cells were very slightly more sensitive than *cdc45*<sup>+</sup> to 5.0 mM HU

and moderately rescued the sensitivity of the *cds1*<sup>Chk2</sup>Δ cells to 1.5 mM HU.

**Fig. S6.** RPA foci in wt and *cds1*<sup>-</sup> cells during HU treatment.

The cultures were incubated at 30°C to log phase, then 12.5 mM HU was added. The cell fractions were taken for the analysis of RPA foci at indicated time during HU treatment. For examining cellular level of broken DNA or vulnerability of chromatin DNA to ssDNA endonuclease P1, the cell cultures of 50 ml at log-phase were added with 12.5 mM HU and incubated for additional 3 hours. Then, the cells were collected and treated with lysing enzyme and lyticase until 95% cells could be lysed by 1% triton. The cells were collected, washed once with PBS and lysed in presence of 1% triton X-100. 200 U nuclease P1 was added, and the reactions were incubated at 37°C for 12 min. DNA was prepared and subjected to 1% agarose gel electrophoresis. The nuclease P1 digests both ssDNA and RNA.

# Figure S1

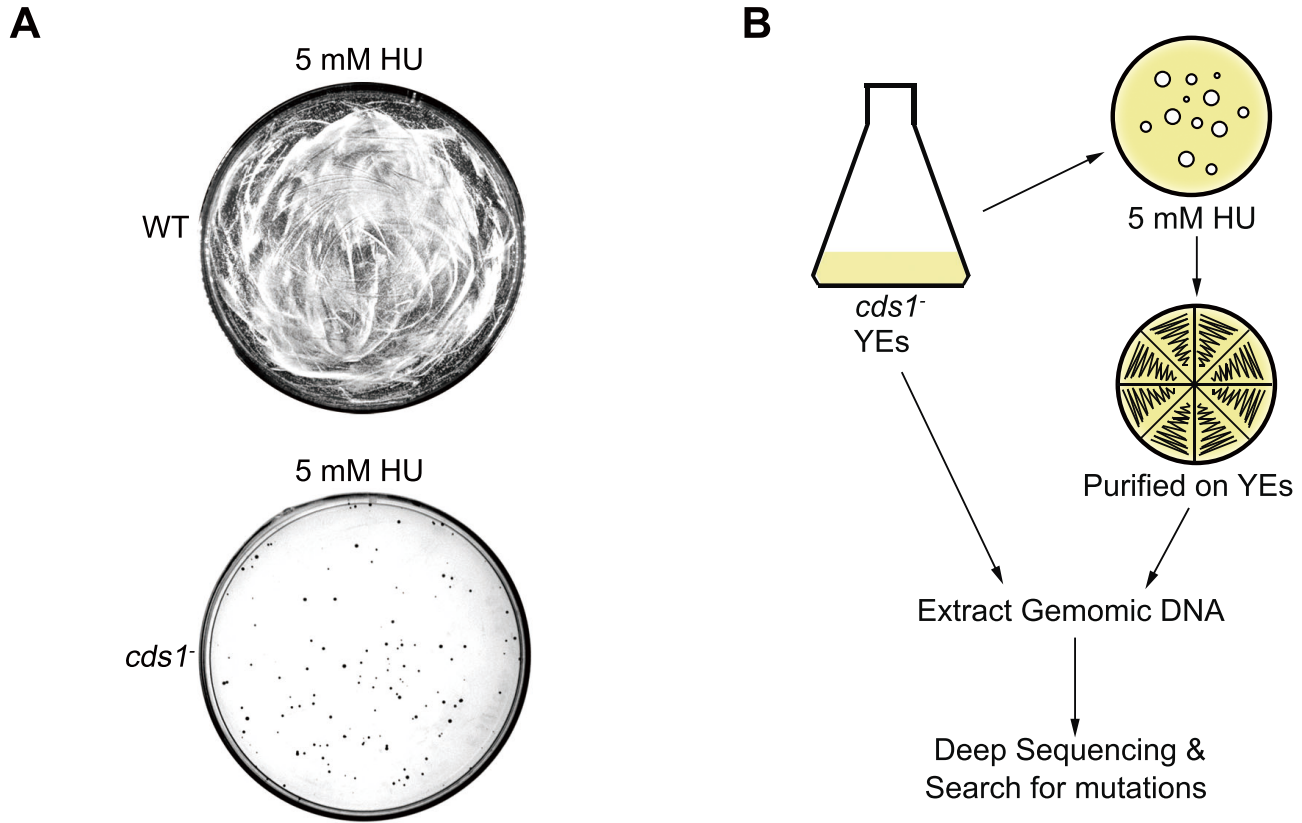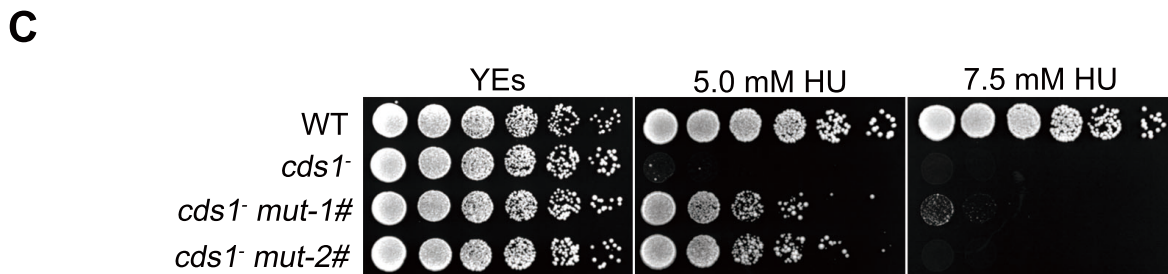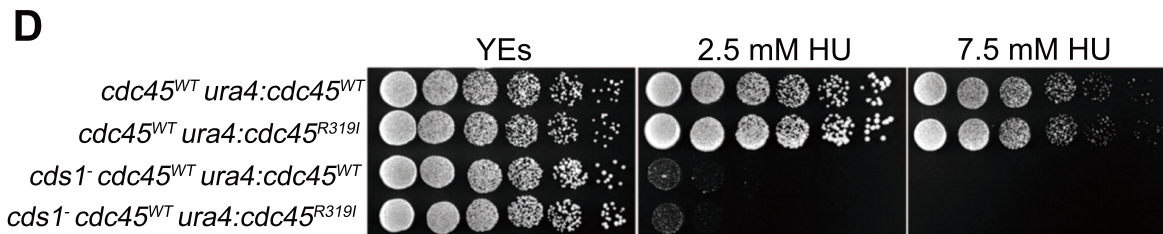

# Figure S1

E

## Cdc45-pS275

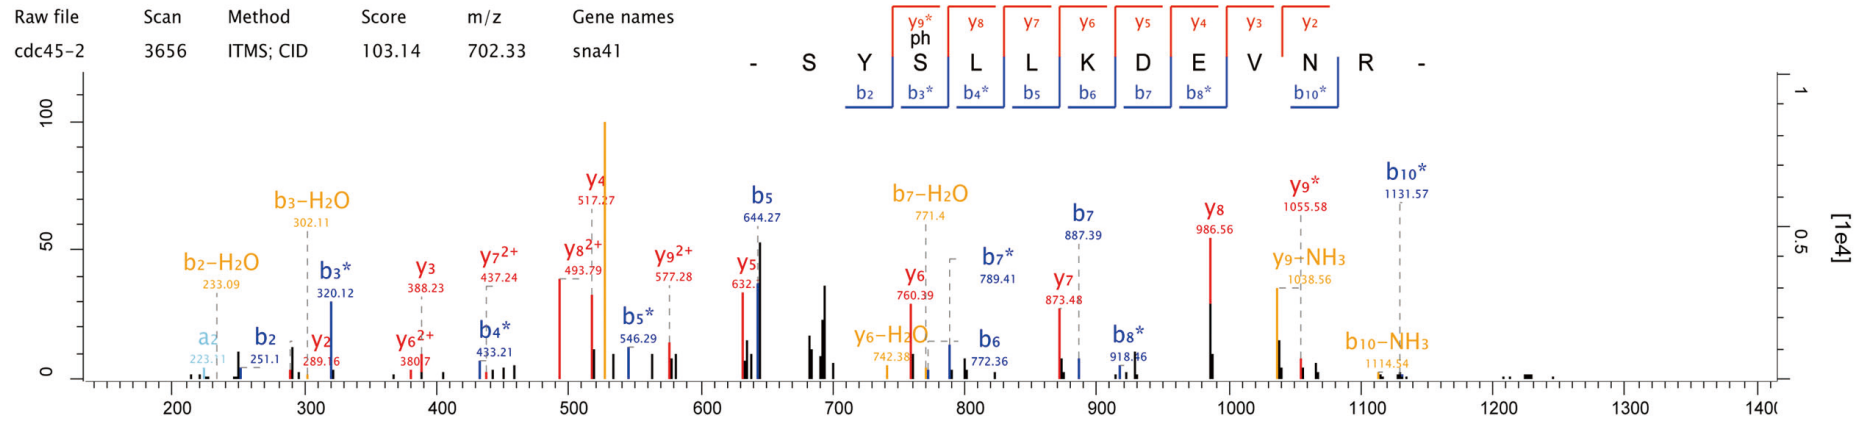

## Cdc45-pS322

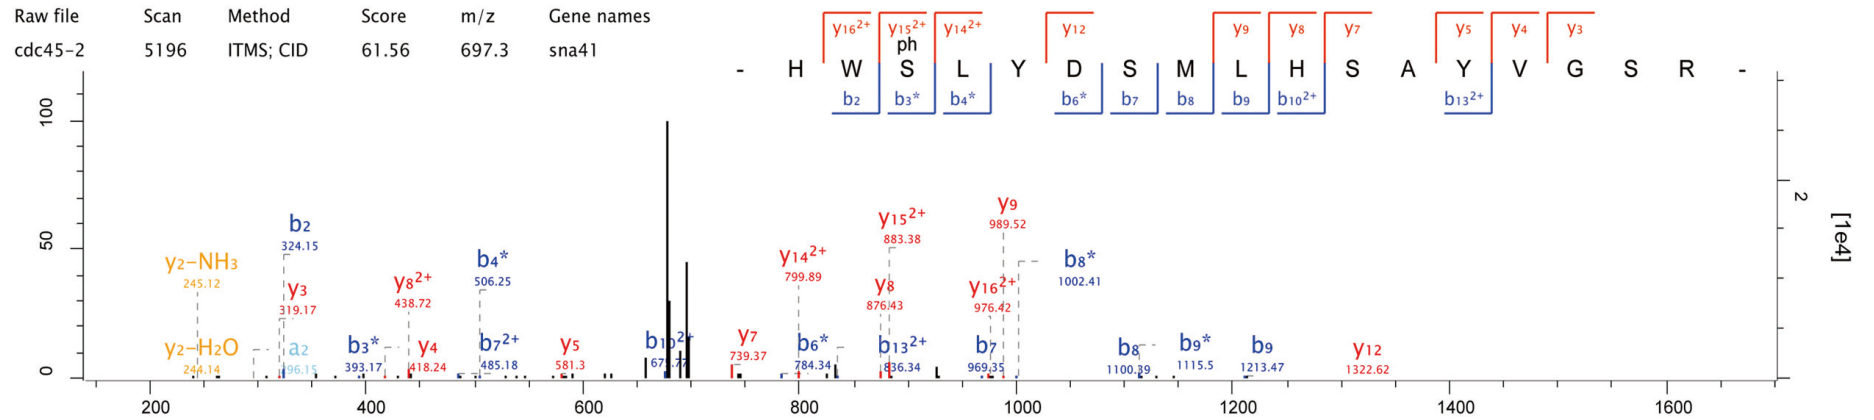

## Cdc45-pS397

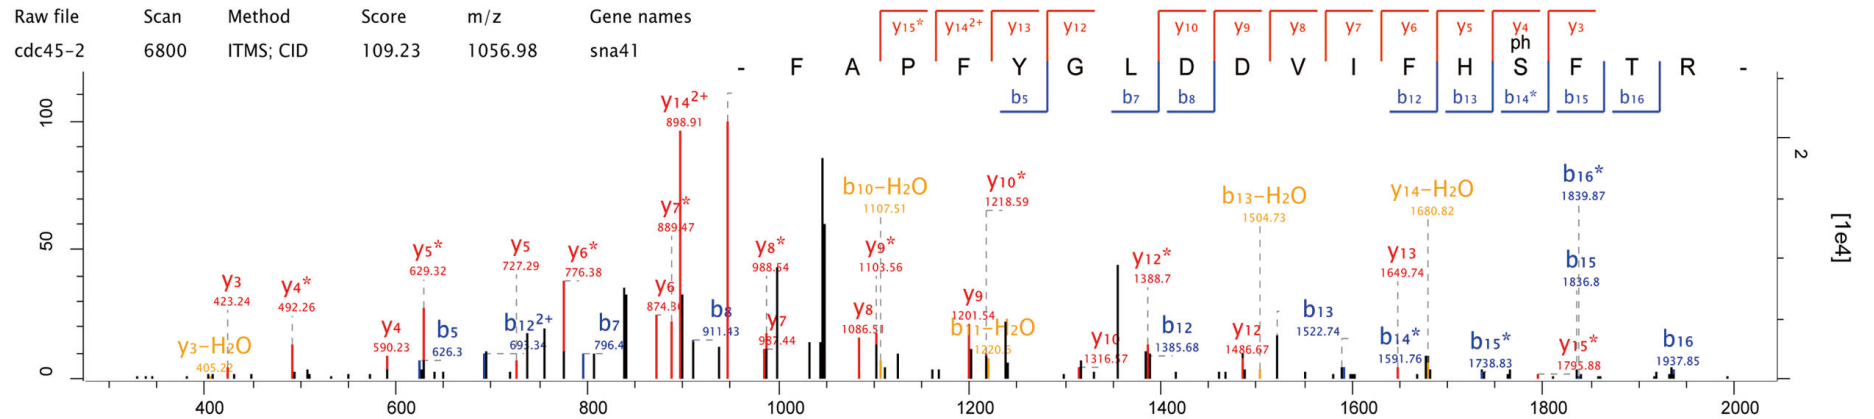



# Figure S1

**F**

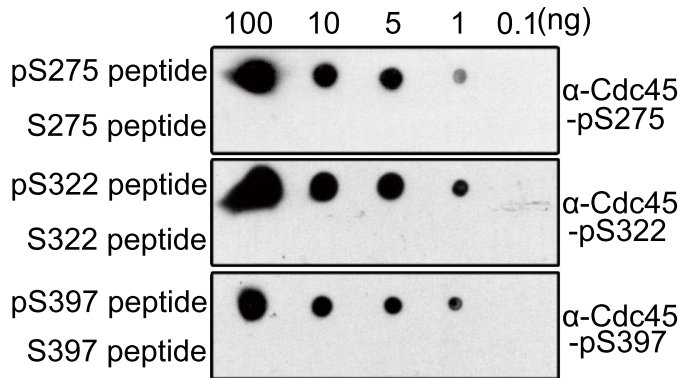

**G**

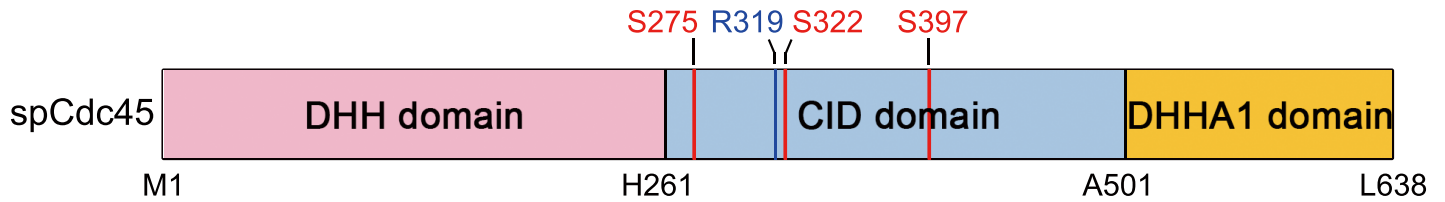

|                      |     |   |   |   |   |   |   |   |   |   |   |   |   |   |   |   |   |   |   |   |   |     |
|----------------------|-----|---|---|---|---|---|---|---|---|---|---|---|---|---|---|---|---|---|---|---|---|-----|
|                      |     |   | ▽ | ▼ |   | ▽ |   |   |   |   |   |   |   |   |   |   |   |   |   |   |   |     |
| <i>H. sapiens</i>    | 234 | T | Q | M | K | Y | V | T | D | V | G | V | L | Q | R | H | V | S | R | H | N | 253 |
| <i>M. musculus</i>   | 234 | T | Q | M | K | Y | V | T | D | V | G | I | L | Q | R | H | V | S | R | H | N | 253 |
| <i>X. laevis</i>     | 235 | T | Q | M | K | Y | V | T | D | V | G | T | L | Q | R | H | V | S | R | H | N | 254 |
| <i>S. pombe</i>      | 266 | S | K | K | Y | F | N | R | S | Y | S | L | L | K | D | E | V | N | R | L | N | 285 |
| <i>S. cerevisiae</i> | 285 | - | A | Q | V | Y | N | R | L | Y | P | L | L | Q | D | E | V | K | R | L | T | 303 |
|                      |     | : | : | : | : | : | : | : | : | : | : | : | * | : | : | . | * | . | * | . | . |     |

|                      |     |   |   |   |   |   |   |   |   |   |   |   |   |   |   |   |   |   |   |   |     |
|----------------------|-----|---|---|---|---|---|---|---|---|---|---|---|---|---|---|---|---|---|---|---|-----|
|                      |     |   |   |   |   |   |   |   |   |   |   |   |   |   |   |   |   |   |   |   |     |
| <i>H. sapiens</i>    | 272 | F | E | Y | D | L | R | L | V | L | Y | Q | H | W | S | L | H | D | S | L | 290 |
| <i>M. musculus</i>   | 272 | F | E | Y | D | L | C | L | V | L | Y | Q | H | W | S | L | H | E | S | L | 290 |
| <i>X. laevis</i>     | 273 | F | E | Y | D | L | R | L | S | L | Y | Q | H | W | S | L | Y | E | S | I | 291 |
| <i>S. pombe</i>      | 309 | L | E | D | E | F | R | F | M | L | V | R | H | W | S | L | Y | D | S | M | 327 |
| <i>S. cerevisiae</i> | 320 | I | Q | P | D | Y | Y | L | F | L | L | R | H | S | S | L | Y | D | S | F | 338 |
|                      |     | : | : | : | : | : | : | : | : | * | : | * | : | * | * | : | : | * | : | : |     |

|                      |     |   |   |   |   |   |   |   |   |   |   |   |   |   |   |   |   |   |   |   |   |     |     |
|----------------------|-----|---|---|---|---|---|---|---|---|---|---|---|---|---|---|---|---|---|---|---|---|-----|-----|
|                      |     |   |   |   |   |   |   |   |   |   |   |   |   |   |   |   |   |   |   |   |   |     |     |
| <i>H. sapiens</i>    | 349 | N | K | F | G | M | K | D | M | R | V | Q | T | F | S | I | H | F | G | F | K | 368 |     |
| <i>M. musculus</i>   | 349 | N | K | F | G | M | K | D | M | R | V | Q | T | F | S | I | Q | F | G | F | K | 368 |     |
| <i>X. laevis</i>     | 350 | N | K | F | G | M | K | D | V | R | V | Q | T | F | S | V | Q | F | G | F | K | 369 |     |
| <i>S. pombe</i>      | 386 | P | F | Y | G | L | D | D | V | I | F | H | S | F | F | T | R | T | Y | G | F | K   | 405 |
| <i>S. cerevisiae</i> | 397 | D | R | Y | G | L | Q | D | I | I | R | D | G | F | V | R | T | L | G | Y | R | 416 |     |
|                      |     | : | * | : | : | * | : | : | : | . | : | * | : | * | : | * | : | * | : | : |   |     |     |

# Figure S1

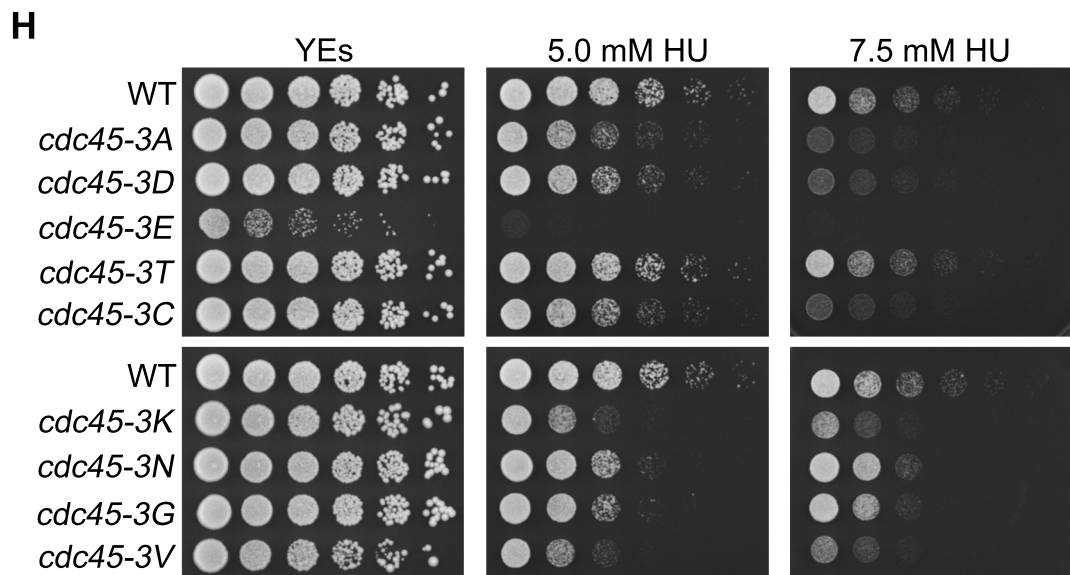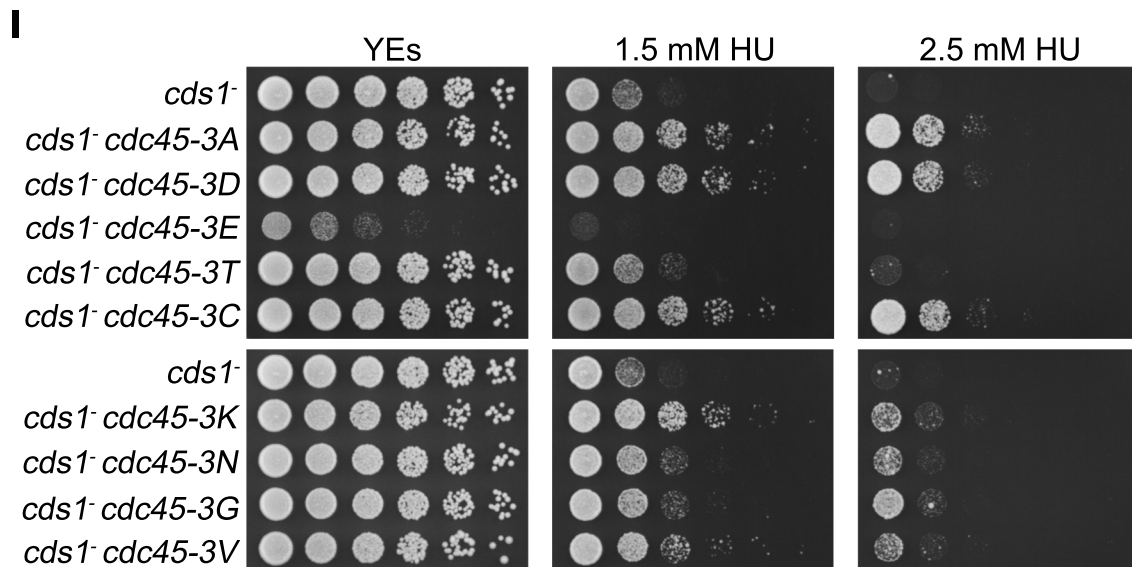

# Figure S2

**A**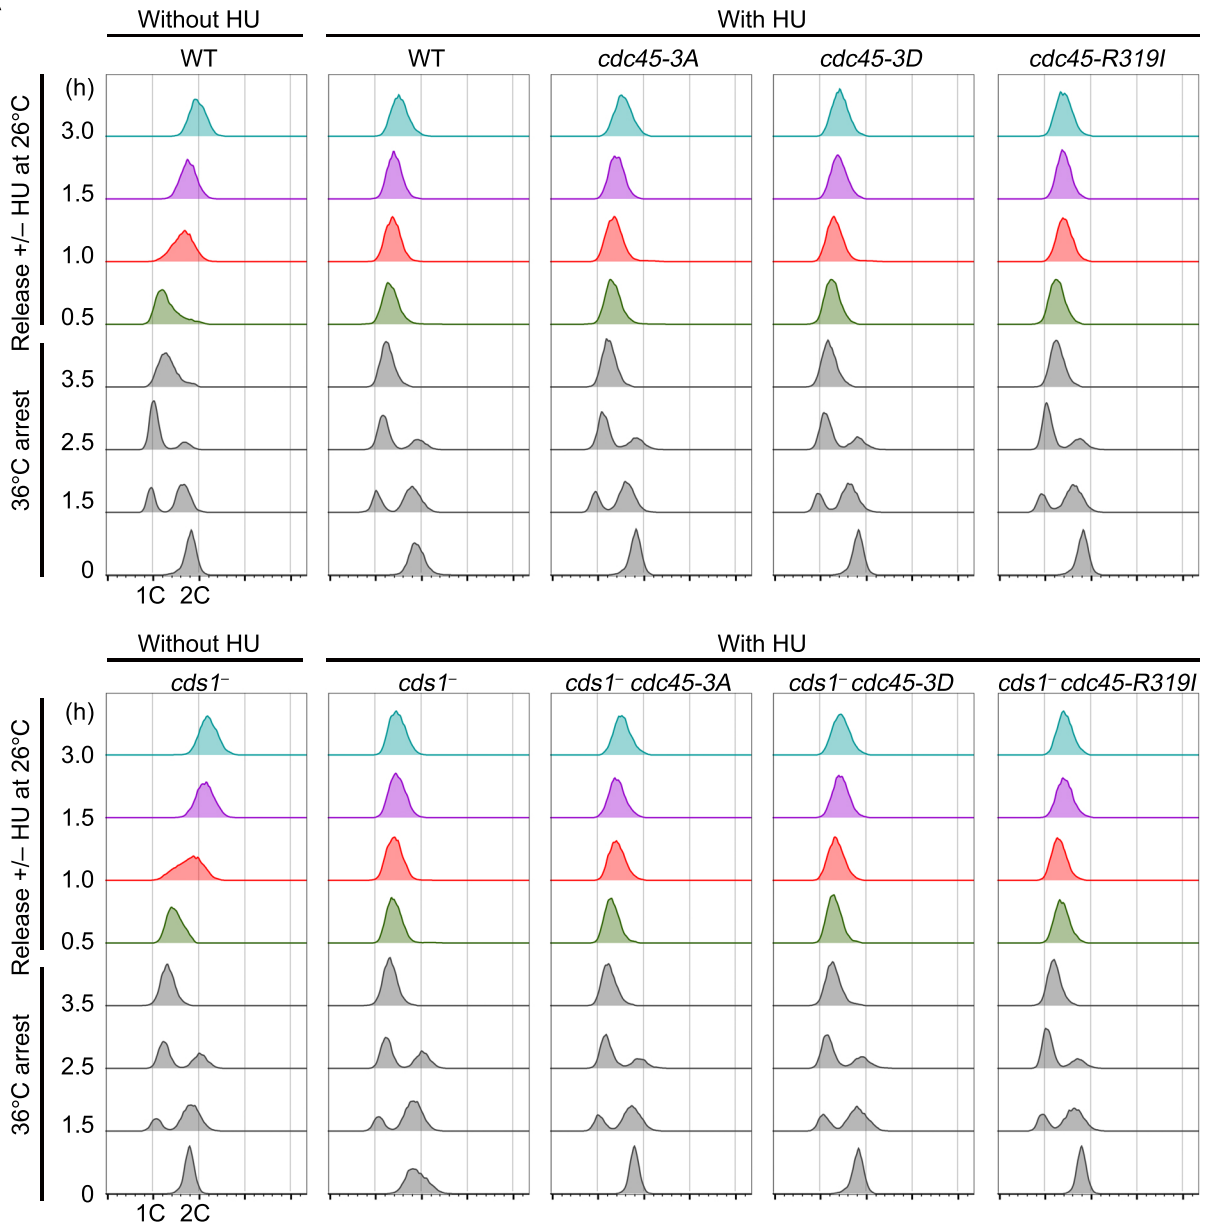

Figure S2

B

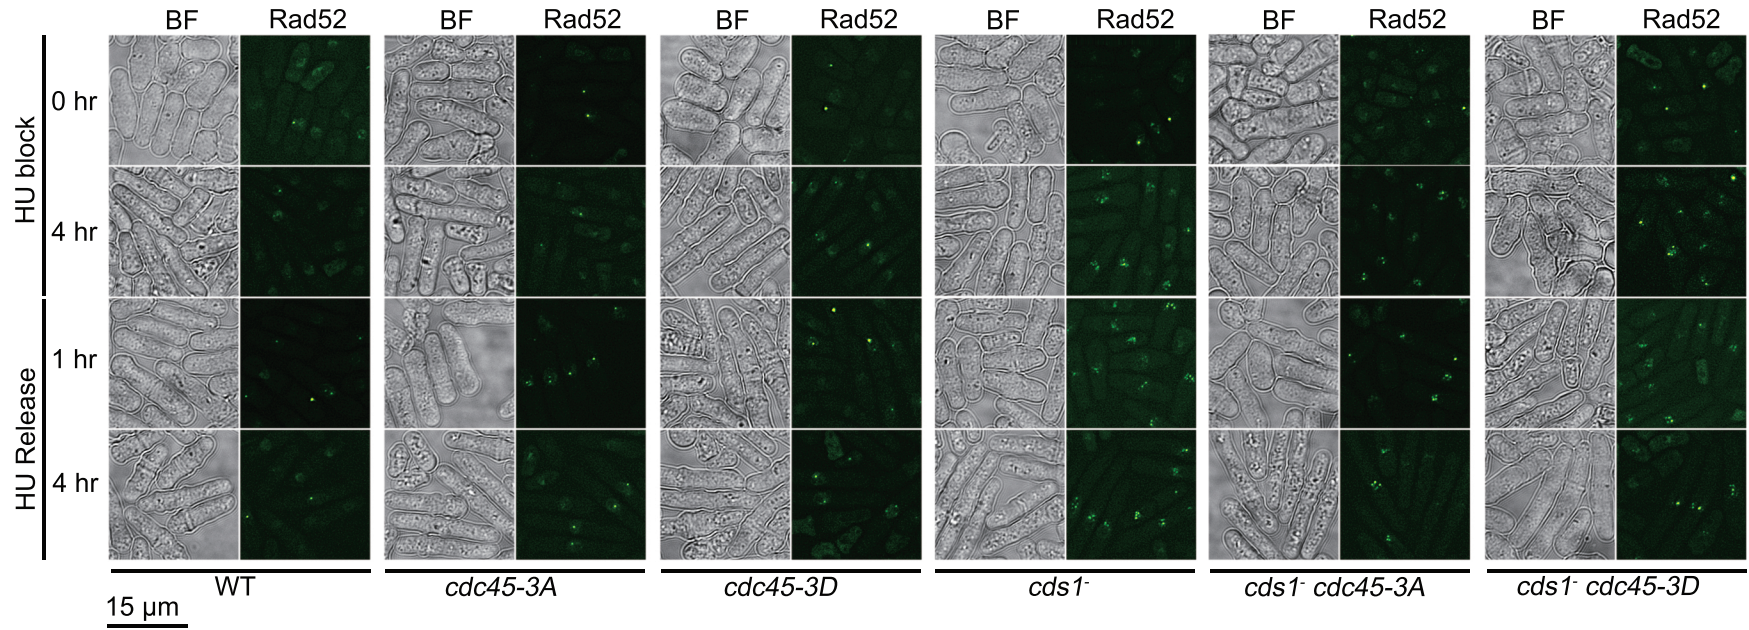



# Figure S3

**A**

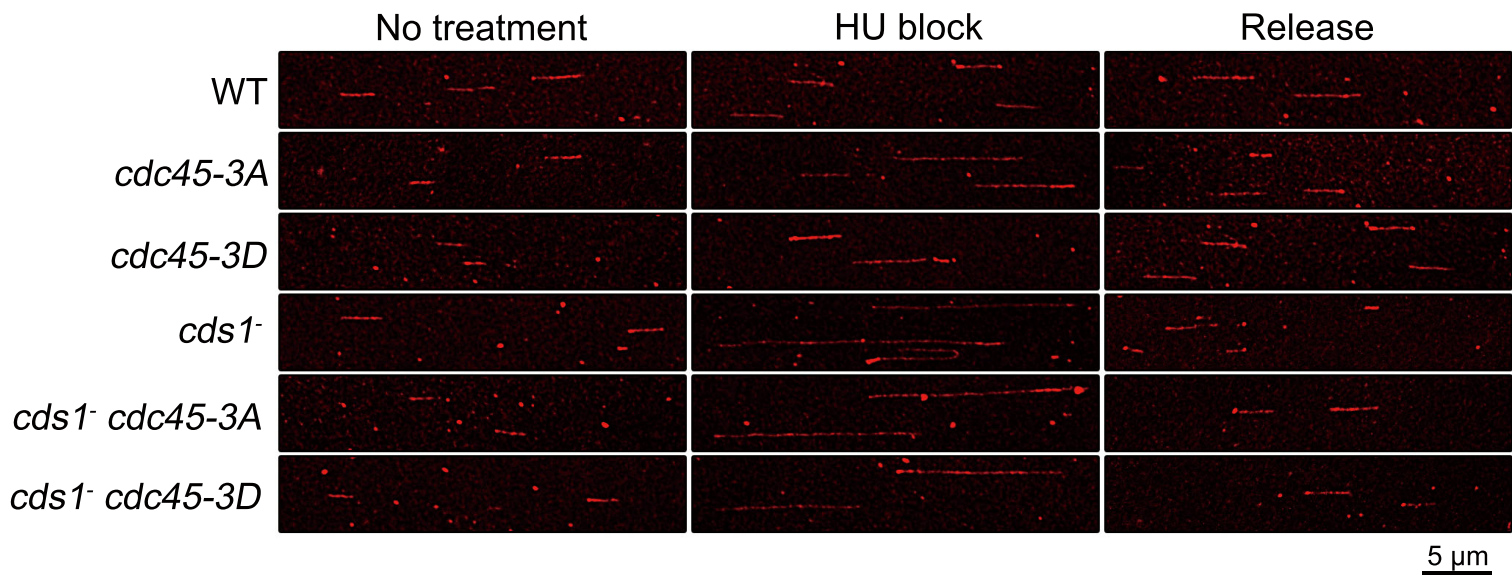

# Figure S3

**B**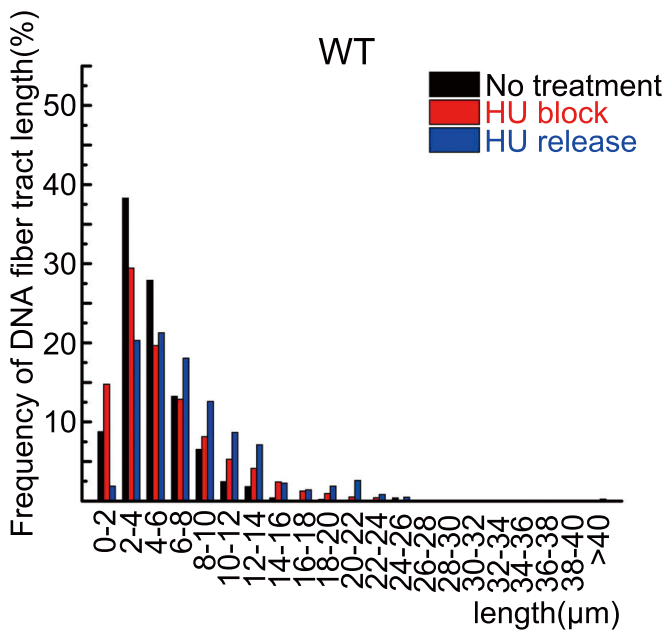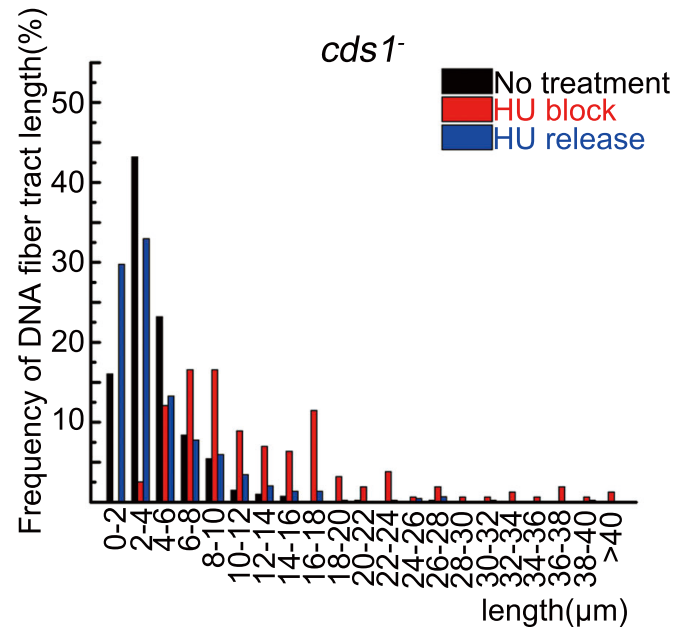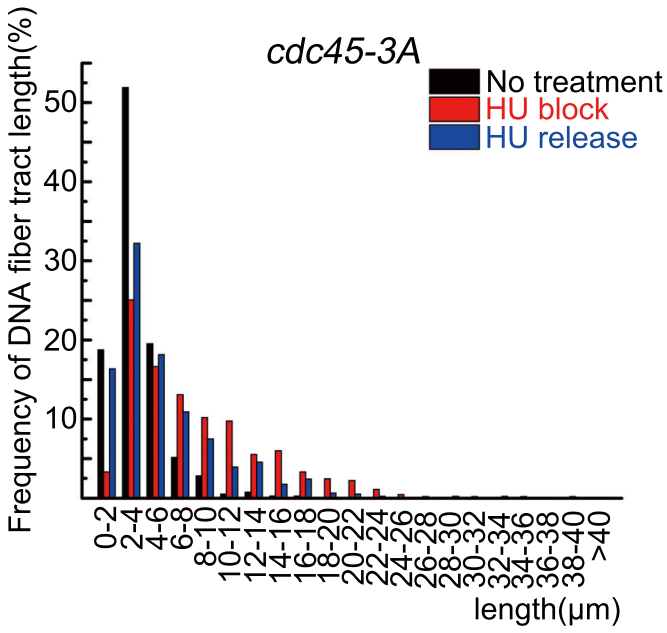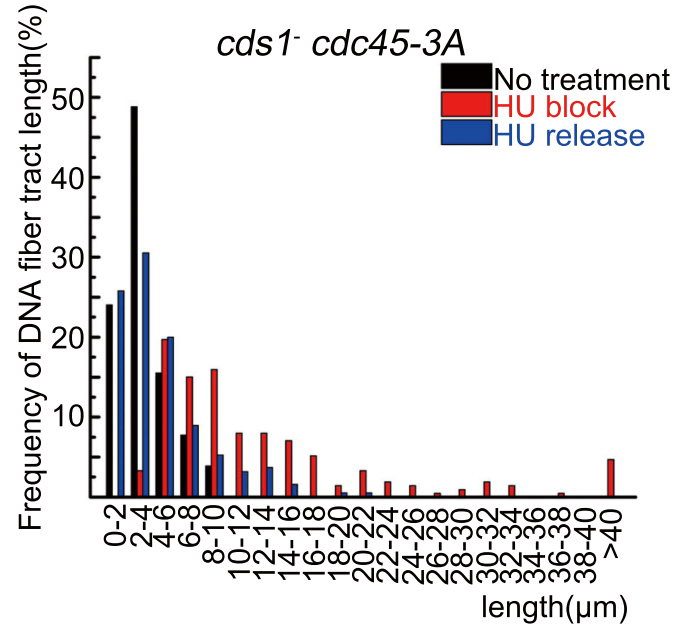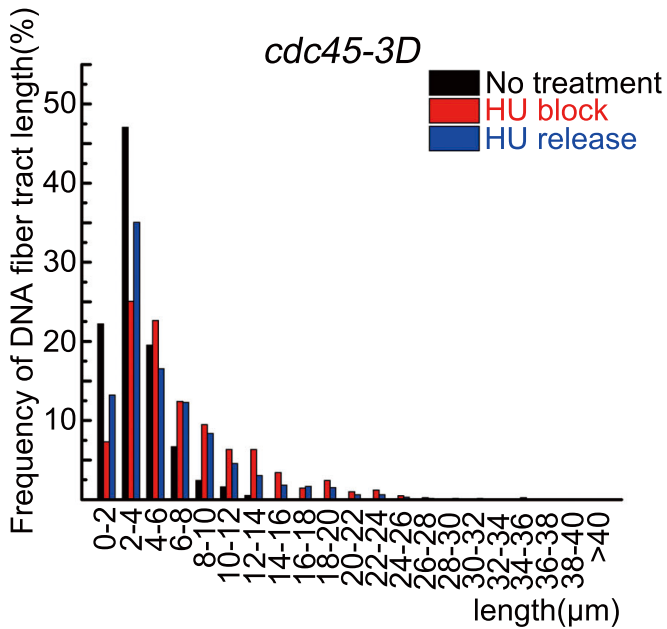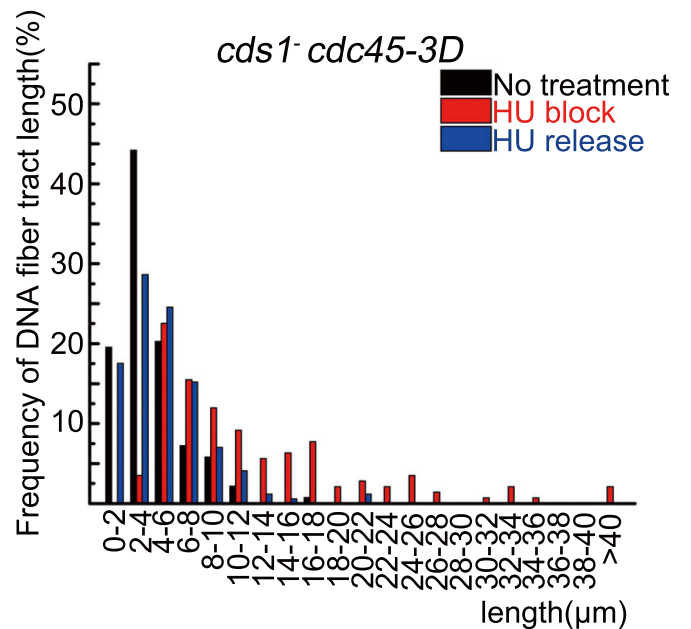

# Figure S4

**A**

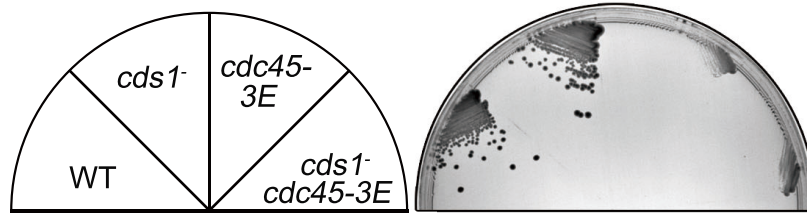

**B**

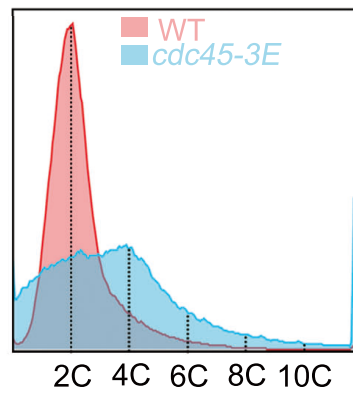

**C**

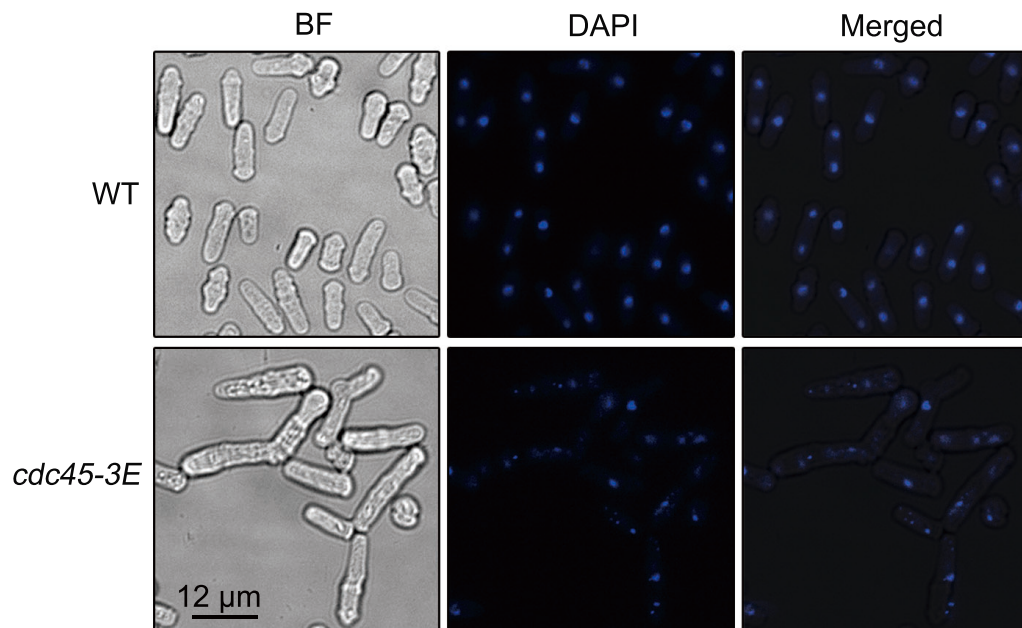

# Figure S5

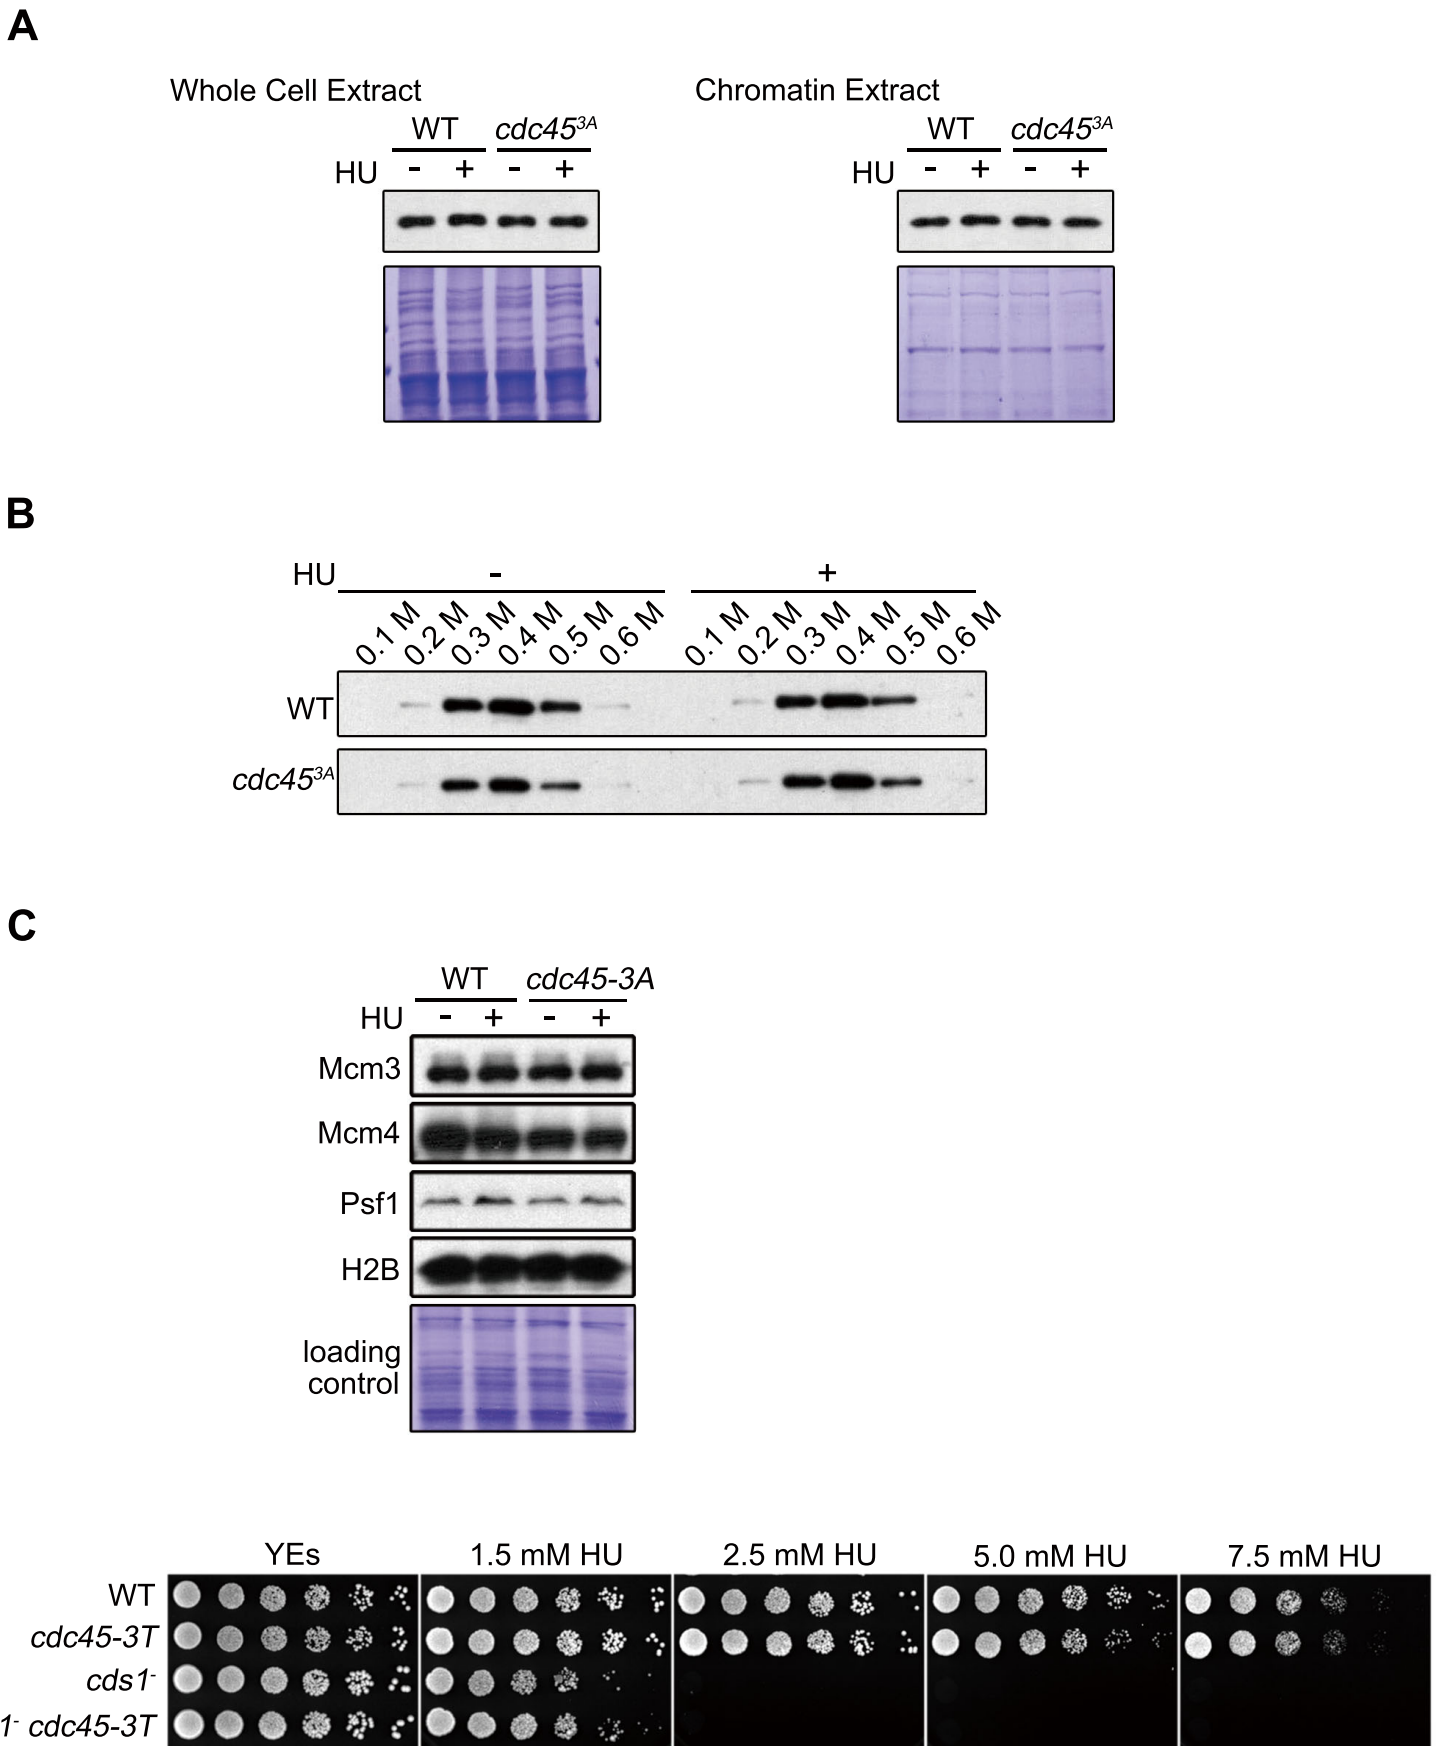



# Figure S6

**A**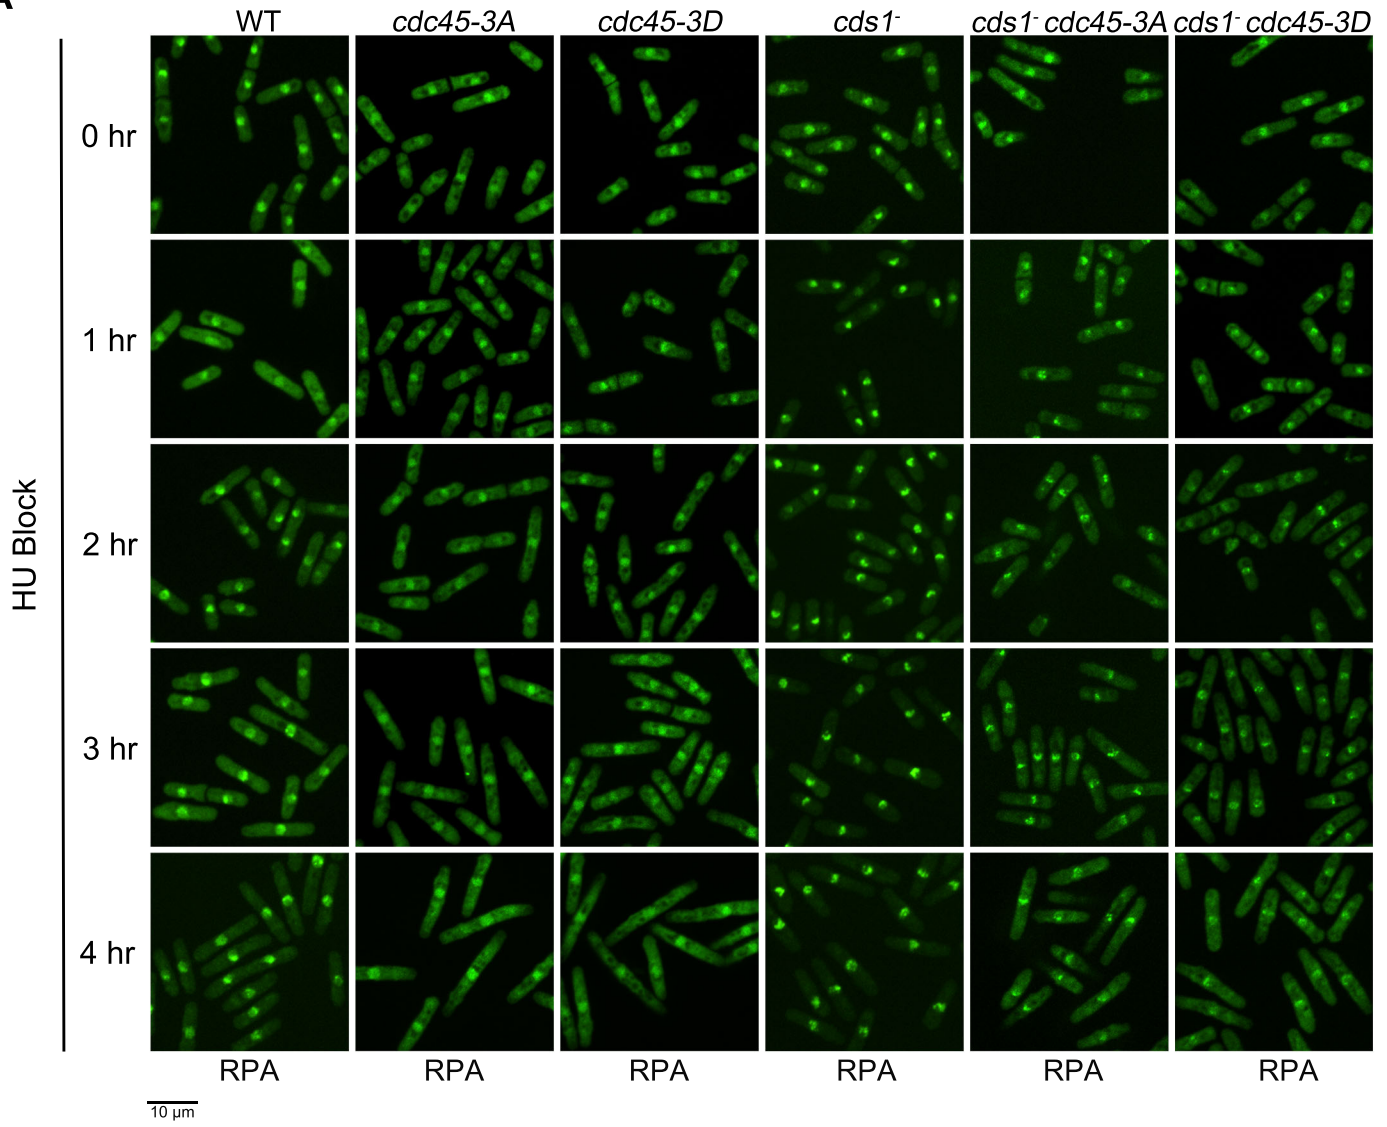**B**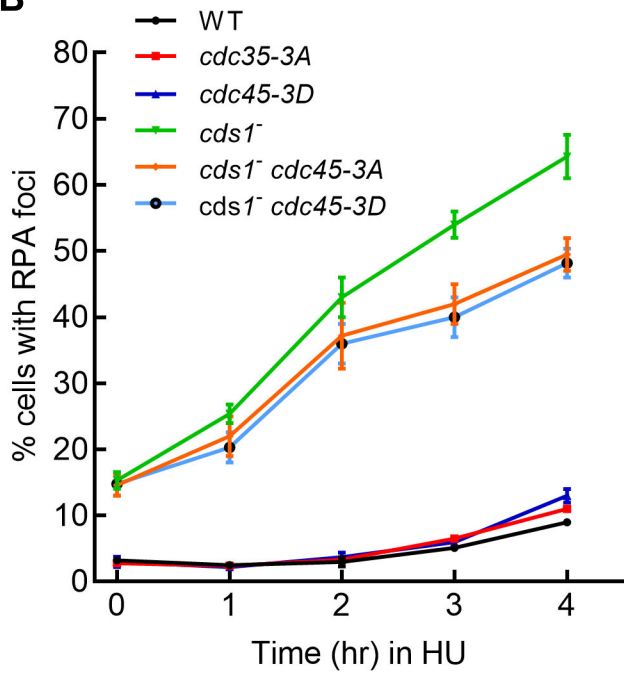**C**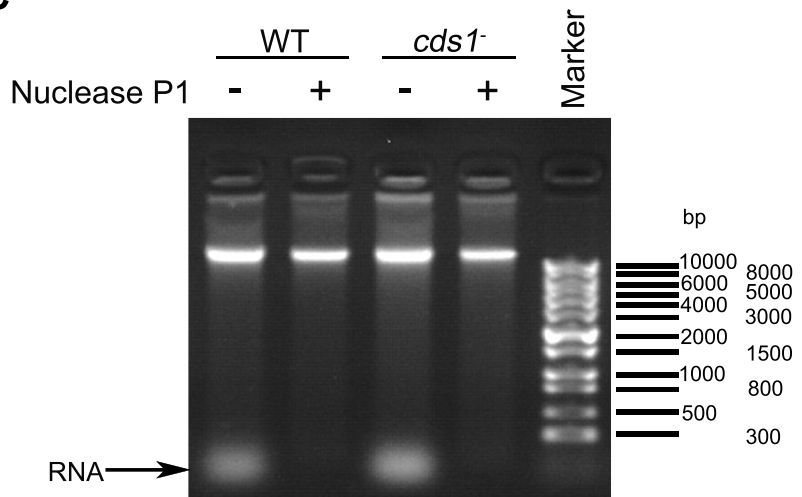

Figure S6

D

WT

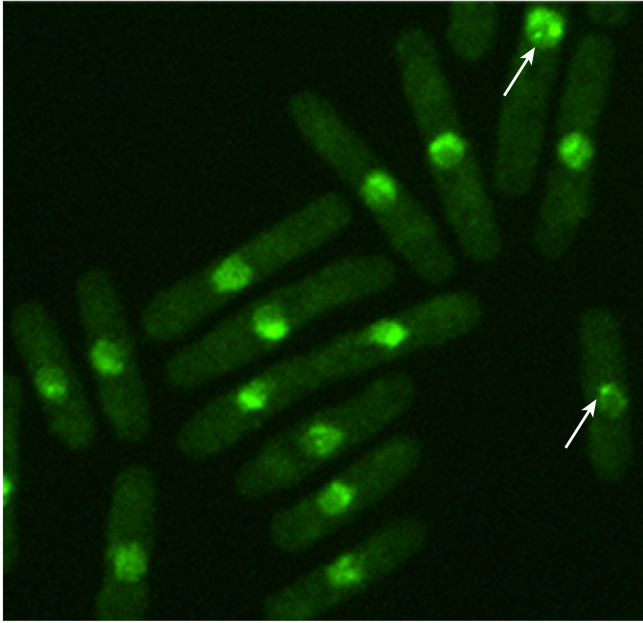

*cds1<sup>-</sup>*

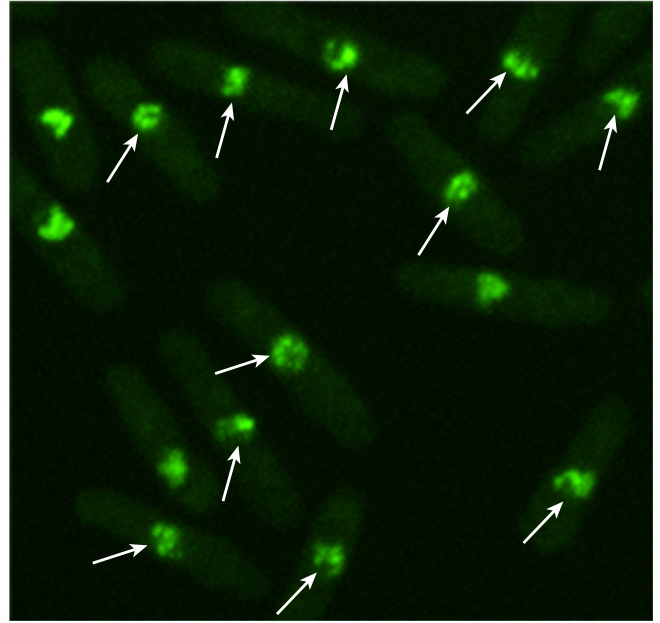

*cdc45-3A*

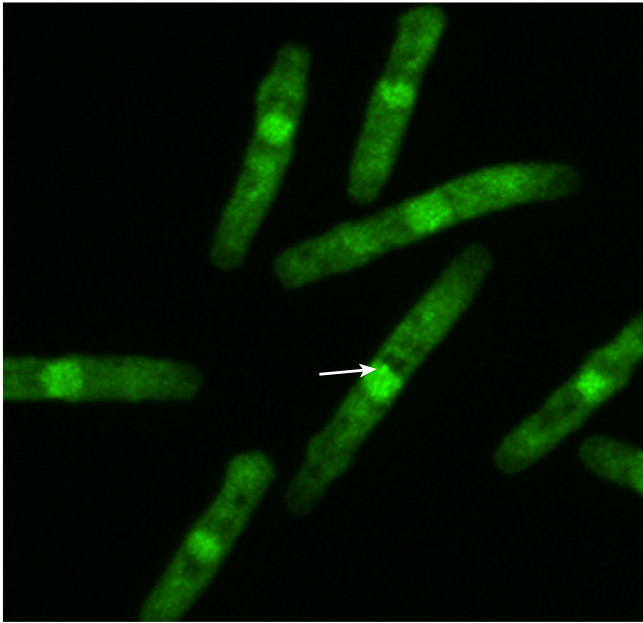

*cds1<sup>-</sup> cdc45-3A*

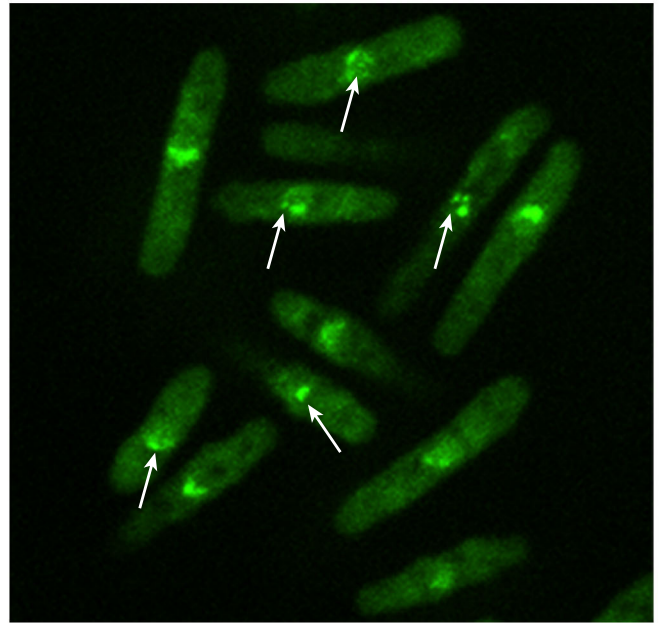

*cdc45-3D*

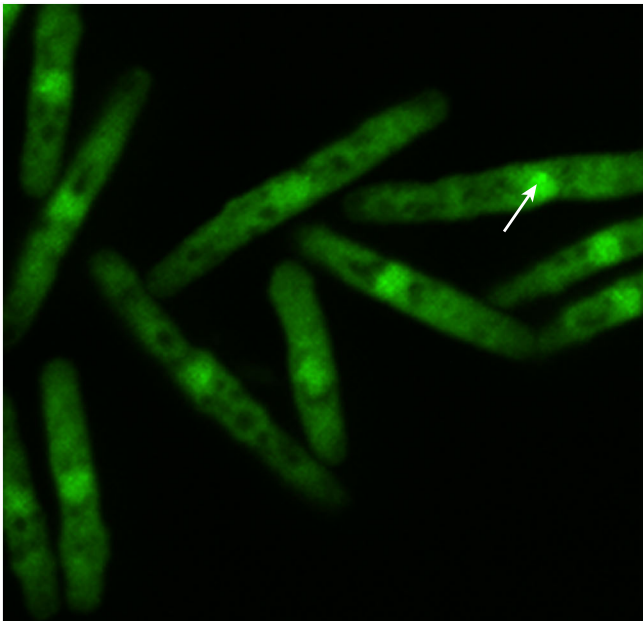

*cds1<sup>-</sup> cdc45-3D*

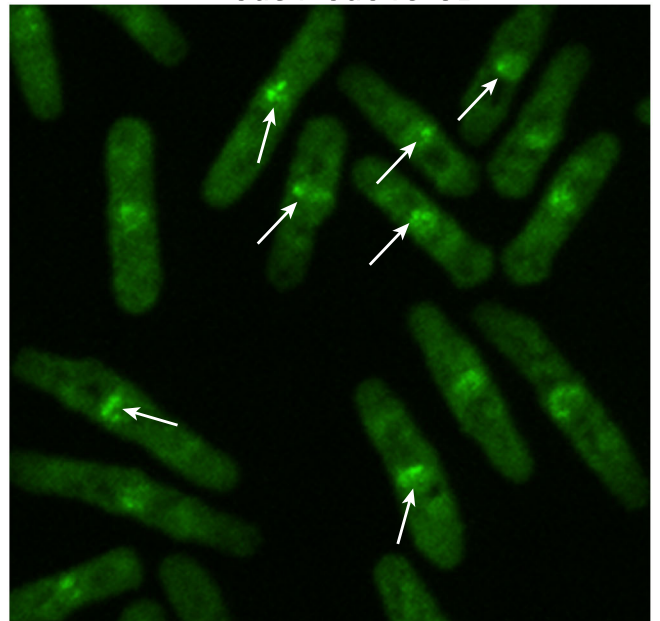

RPA

RPA

HU Block 4hr

10  $\mu$ m
